# Supplementary material for: Umsetzbarkeit des interdisziplinären multimodalen Assessments – die Teamperspektive
Source: Springer Nature journal article supplement (doi:10.1007/s00482-024-00796-z), 2024-04-09

|  |                                                                                                                                                                                                                                                                                                                                                                                                                                                                                                                                                                                                                                                                                                                                                                                                                                                                      |                                                        |                                                                                     |                                                                                                                                                                                                                                                                                                                      |
|--|----------------------------------------------------------------------------------------------------------------------------------------------------------------------------------------------------------------------------------------------------------------------------------------------------------------------------------------------------------------------------------------------------------------------------------------------------------------------------------------------------------------------------------------------------------------------------------------------------------------------------------------------------------------------------------------------------------------------------------------------------------------------------------------------------------------------------------------------------------------------|--------------------------------------------------------|-------------------------------------------------------------------------------------|----------------------------------------------------------------------------------------------------------------------------------------------------------------------------------------------------------------------------------------------------------------------------------------------------------------------|
|  | <ul style="list-style-type: none"> <li>Wie praktikabel (Vor- und Nachteile) sind die verwendeten psychometrischen Testverfahren, insbesondere SKID und MASK-P?</li> <li>Welchen Nutzen haben die psychometrischen Testverfahren und der MASK-P für den Entscheidungsprozess?</li> </ul> <p>Nutzen der PSFS und Hypothesen zum Schmerz für den eigenen Entscheidungsprozess im Hinblick auf die physiotherapeutische Beurteilung und für den Teamprozess</p> <ul style="list-style-type: none"> <li>Wie praktikabel (Vor- und Nachteile) sind die im IMA eingesetzten Verfahren (1) Patientenspezifische Funktionsskala und (2) Hypothesen zum Schmerz und (3) sonstige Verfahren, die von den Therapeut:innen angewendet wurden?</li> <li>Welchen Nutzen haben die zuvor genannten Verfahren hinsichtlich des physiotherapeutischen Entscheidungsprozess?</li> </ul> | <p><b>Vierfeldertafel</b><br/>(Vorteile/Nachteile)</p> | 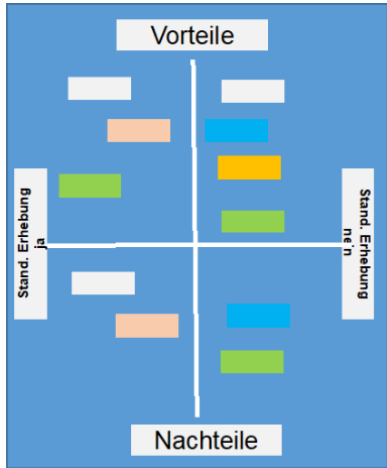 | <ul style="list-style-type: none"> <li>Evtl. andere Testpsychometrie</li> <li>Sonstige Anmerkungen</li> </ul> <ul style="list-style-type: none"> <li>General: standardisierte Erhebung</li> <li>PSFS</li> <li>Hypothesen zum Schmerz</li> <li>Evtl. andere Testpsychometrie</li> <li>Sonstige Anmerkungen</li> </ul> |
|--|----------------------------------------------------------------------------------------------------------------------------------------------------------------------------------------------------------------------------------------------------------------------------------------------------------------------------------------------------------------------------------------------------------------------------------------------------------------------------------------------------------------------------------------------------------------------------------------------------------------------------------------------------------------------------------------------------------------------------------------------------------------------------------------------------------------------------------------------------------------------|--------------------------------------------------------|-------------------------------------------------------------------------------------|----------------------------------------------------------------------------------------------------------------------------------------------------------------------------------------------------------------------------------------------------------------------------------------------------------------------|

| <p><b>Arbeitsphase 2</b><br/>Berufsgruppenspezifisch/<br/>-übergreifend</p> | <p>Erfassung des Verständnisses zu den Kriterien und dem Nutzen der fachspezifischen Einschätzung für die Teamsitzung</p> <ul style="list-style-type: none"> <li>Welche Kriterien ziehen die Berufsgruppen zur Beurteilung der jeweiligen Einschätzungen heran?</li> <li>Welcher Zusammenhang besteht zwischen den vier Einschätzungen?</li> <li>Wie beschreiben die Berufsgruppen jeweils die vier übergeordneten Einschätzungen?</li> <li>Wie praktikabel ist die Einschätzung in Vorbereitung auf die Teamsitzung?</li> </ul> | <p><b>Einzelarbeit</b><br/>(inkl. vorbereiteter Materialien, z.B. DSF, Häufigkeitsverteilung)</p> <p><b>Gruppenarbeit 1 – Kriterien &amp; Verständnis</b><br/>(Zuordnung &amp; Sortierung Nähe/Distanz)</p> <p><b>Gruppenarbeit 2</b></p> | <p>Fachspezifische Einschätzung für die Teamsitzung:</p> <table border="1" data-bbox="1346 871 2152 1153"> <thead> <tr> <th>Schweregrad Störungsbild</th> <th>Bedeutung für Schmerzproblematik</th> <th>IMST-Ansatz erforderlich</th> <th>Spezifische Behandlung erforderlich</th> </tr> </thead> <tbody> <tr> <td>—</td> <td>—</td> <td>—</td> <td>—</td> </tr> <tr> <td>0 = kein<br/>1 = leicht<br/>2 = mittel<br/>3 = schwer</td> <td>0 = keine<br/>1 = gering<br/>2 = moderat<br/>3 = hoch</td> <td>0 = nein<br/>1 = fraglich<br/>2 = ja</td> <td>0 = nein<br/>1 = fraglich<br/>2 = ja</td> </tr> </tbody> </table> <p>Fokus Medizin: somatisch</p> <p>Fokus Psychologie: psycho-sozial</p> <p>Fokus Physiotherapie funktionell</p> | Schweregrad Störungsbild | Bedeutung für Schmerzproblematik | IMST-Ansatz erforderlich | Spezifische Behandlung erforderlich | — | — | — | — | 0 = kein<br>1 = leicht<br>2 = mittel<br>3 = schwer | 0 = keine<br>1 = gering<br>2 = moderat<br>3 = hoch | 0 = nein<br>1 = fraglich<br>2 = ja | 0 = nein<br>1 = fraglich<br>2 = ja |
|-----------------------------------------------------------------------------|----------------------------------------------------------------------------------------------------------------------------------------------------------------------------------------------------------------------------------------------------------------------------------------------------------------------------------------------------------------------------------------------------------------------------------------------------------------------------------------------------------------------------------|-------------------------------------------------------------------------------------------------------------------------------------------------------------------------------------------------------------------------------------------|-----------------------------------------------------------------------------------------------------------------------------------------------------------------------------------------------------------------------------------------------------------------------------------------------------------------------------------------------------------------------------------------------------------------------------------------------------------------------------------------------------------------------------------------------------------------------------------------------------------------------------------------------------------------------------------------------------------------------------------------|--------------------------|----------------------------------|--------------------------|-------------------------------------|---|---|---|---|----------------------------------------------------|----------------------------------------------------|------------------------------------|------------------------------------|
| Schweregrad Störungsbild                                                    | Bedeutung für Schmerzproblematik                                                                                                                                                                                                                                                                                                                                                                                                                                                                                                 | IMST-Ansatz erforderlich                                                                                                                                                                                                                  | Spezifische Behandlung erforderlich                                                                                                                                                                                                                                                                                                                                                                                                                                                                                                                                                                                                                                                                                                     |                          |                                  |                          |                                     |   |   |   |   |                                                    |                                                    |                                    |                                    |
| —                                                                           | —                                                                                                                                                                                                                                                                                                                                                                                                                                                                                                                                | —                                                                                                                                                                                                                                         | —                                                                                                                                                                                                                                                                                                                                                                                                                                                                                                                                                                                                                                                                                                                                       |                          |                                  |                          |                                     |   |   |   |   |                                                    |                                                    |                                    |                                    |
| 0 = kein<br>1 = leicht<br>2 = mittel<br>3 = schwer                          | 0 = keine<br>1 = gering<br>2 = moderat<br>3 = hoch                                                                                                                                                                                                                                                                                                                                                                                                                                                                               | 0 = nein<br>1 = fraglich<br>2 = ja                                                                                                                                                                                                        | 0 = nein<br>1 = fraglich<br>2 = ja                                                                                                                                                                                                                                                                                                                                                                                                                                                                                                                                                                                                                                                                                                      |                          |                                  |                          |                                     |   |   |   |   |                                                    |                                                    |                                    |                                    |

|                                                                             |                                                                                                                                                                                                                                                             |                                                                                                                                                                        |                                                                                                                                                                                                                                                                                                                                                                                                                                                                                                                                                                                                                                                                                                                                  |
|-----------------------------------------------------------------------------|-------------------------------------------------------------------------------------------------------------------------------------------------------------------------------------------------------------------------------------------------------------|------------------------------------------------------------------------------------------------------------------------------------------------------------------------|----------------------------------------------------------------------------------------------------------------------------------------------------------------------------------------------------------------------------------------------------------------------------------------------------------------------------------------------------------------------------------------------------------------------------------------------------------------------------------------------------------------------------------------------------------------------------------------------------------------------------------------------------------------------------------------------------------------------------------|
|                                                                             |                                                                                                                                                                                                                                                             | <p>Übernahme der Kriterien aus Gruppenarbeit 1 und Einstufung nach:<br/> (1) Wichtigkeit <i>und</i><br/> (2) Sicherheit</p> <p><b>Markt der Ideen</b><br/> (2-mal)</p> | <p>The top diagram, titled "Eigene Kriterien für...", shows a flowchart where "Schweregrad" (Severity) and "Bedeutung für Schmerzproblematik" (Importance for pain problem) lead to "IMST/Spec. Therapiebedarf" (IMST/Spec. Therapy need). A legend on the right includes "Kriterien" (Criteria) and "Sonstige Anmerkungen" (Other notes).</p> <p>The bottom diagram shows two scales: "Wichtigkeit" (Importance) and "Sicherheit" (Safety), both ranging from 0 (0 gar nicht / 10 absolut) to 10. A central vertical scale from 10 to 0 is shown. A legend on the right includes "Kriterien" (Criteria), "Sonstige Anmerkungen" (Other notes), and "Was könnte mehr Sicherheit erzeugen?" (What could create more safety?).</p> |
| <p><b>Arbeitsphase 3</b><br/> Interdisziplinär/<br/> Interprofessionell</p> | <p><b>Therapieempfehlung</b></p> <ul style="list-style-type: none"> <li>• Welche Kriterien werden für die Therapieempfehlungen hinzugezogen?</li> <li>• Welche Bedeutung hat in diesem Zusammenhang auch die „Einschätzung für die Teamsitzung“?</li> </ul> | <p><b>World Café/<br/> Clustern</b><br/> (1x60 Minuten, 2x30 Minuten)</p>                                                                                              |                                                                                                                                                                                                                                                                                                                                                                                                                                                                                                                                                                                                                                                                                                                                  |

- *Wie kommt es im Team zu einer Therapieempfehlung?*
- *Was für Informationen werden von den unterschiedlichen Berufsgruppen benötigt, um eine gemeinsame Empfehlung festzulegen?*

**Teamsitzung (real vs ideal)**

- *Wie gestaltet sich der Ablauf einer Teamsitzung?/Wie ist die Teamsitzung strukturiert? (real vs. ideal) → **Struktur und Ablauf einer Teamsitzung***
- *Welche Inhalte werden in der Teamsitzung besprochen? (real vs. ideal) → **Inhalte einer Teamsitzung***
- *Wie gestaltet sich die Interaktion der Berufsgruppen während einer Teamsitzung? (real vs. ideal) → **Interaktion innerhalb einer Teamsitzung***

**Abschlussgespräch (real vs ideal)**

- *Wie gestaltet sich der Ablauf eines Abschlussgesprächs? (real vs. ideal)*
- *Wie gestaltet sich die Interaktion mit den Patient:innen und den Berufsgruppen? (real vs. ideal)*
- *Wie erfolgt die Übermittlung der Therapieempfehlung? (real vs. ideal)*

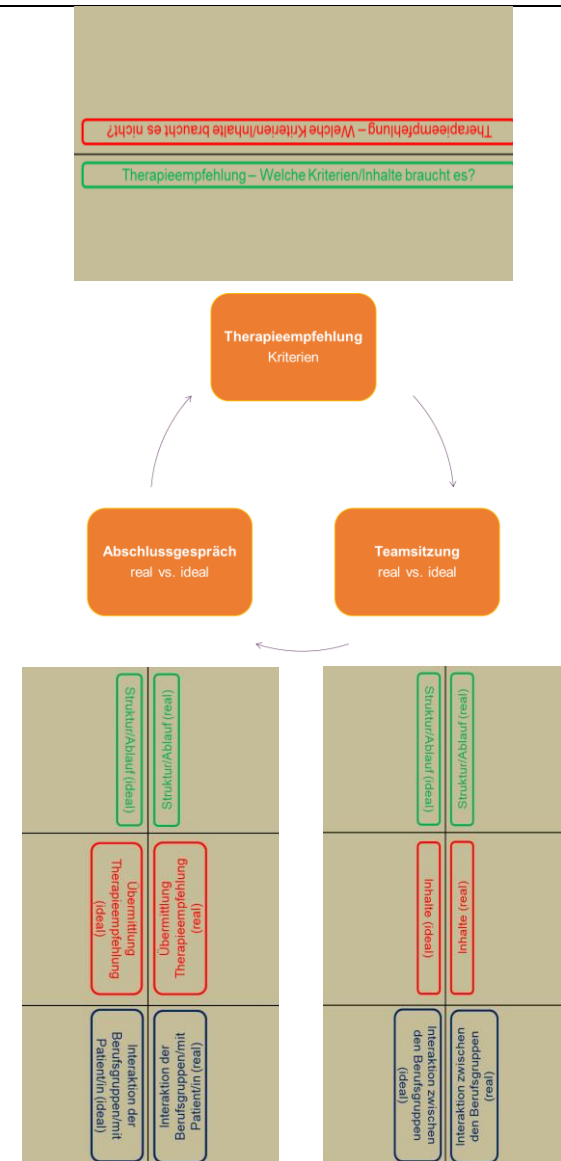

Supplement: MOESM4 [file 26959478]
