# Supplementary material for: Umsetzbarkeit des interdisziplinären multimodalen Assessments – die Teamperspektive
Source: Springer Nature journal article supplement (doi:10.1007/s00482-024-00796-z), 2024-04-09
Supplement: MOESM1 [file 26959478]

## Online-Zusatzmaterial 1 – Zeit- und Ablaufplan Workshop IMA

| <b>Zeit</b> | <b>Ablauf und Inhalt</b>                                                                                                                                                                                                                                                                                                                                                                                                                     |
|-------------|----------------------------------------------------------------------------------------------------------------------------------------------------------------------------------------------------------------------------------------------------------------------------------------------------------------------------------------------------------------------------------------------------------------------------------------------|
| 10:00 Uhr   | <b>Ankommen</b>                                                                                                                                                                                                                                                                                                                                                                                                                              |
| 10:30 Uhr   | <b>Eröffnung und Begrüßung, inkl.</b> <ul style="list-style-type: none"> <li>• Vorstellung Projektteam</li> <li>• Ablauf heutiger Tag</li> <li>• Gruppeneinteilung ärztlich, physiotherapeutisch und psychologisch</li> </ul>                                                                                                                                                                                                                |
| 10:50 Uhr   | <b>Vorstellung innerhalb der Kleingruppen (berufsgruppenbezogen) und Einstieg in den Tag</b> <ul style="list-style-type: none"> <li>• Kurzvorstellung der Teilnehmenden (Name, Einrichtung, Motivation der Teilnahme am Workshop)</li> </ul> Kurzeinstieg ins IMA: <ul style="list-style-type: none"> <li>• Wir im IMA ...</li> <li>• Das IMA ist ...</li> <li>• Unsere Rolle heute ...</li> <li>• Wir wünschen uns für heute ...</li> </ul> |
| 11:15 Uhr   | <b>Arbeitsphase I</b> ( <i>berufsgruppenbezogen</i> )                                                                                                                                                                                                                                                                                                                                                                                        |
| 12:15 Uhr   | <b>Mittagspause</b>                                                                                                                                                                                                                                                                                                                                                                                                                          |
| 13:15 Uhr   | <b>Arbeitsphase II</b> ( <i>berufsgruppenbezogen/-übergreifend</i> )                                                                                                                                                                                                                                                                                                                                                                         |
| 15:00 Uhr   | <b>Arbeitsphase III – Teil 1</b> ( <i>interprofessionell</i> )<br>3 Thementische: <ul style="list-style-type: none"> <li>• Teamsitzung</li> <li>• Therapieempfehlung</li> <li>• Abschlussgespräch</li> </ul>                                                                                                                                                                                                                                 |
| 16:00 Uhr   | <b>Kaffeepause</b>                                                                                                                                                                                                                                                                                                                                                                                                                           |
| 16:30 Uhr   | <b>Arbeitsphase III – Weiterführung Teil 1</b> ( <i>interprofessionell</i> )                                                                                                                                                                                                                                                                                                                                                                 |
| 17:00 Uhr   | <b>Arbeitsphase III – Teil 2</b> ( <i>interprofessionell</i> )                                                                                                                                                                                                                                                                                                                                                                               |
| 18:00 Uhr   | <b>Gemeinsamer Abschluss/Ausklang</b>                                                                                                                                                                                                                                                                                                                                                                                                        |
| 18:30 Uhr   | <b>Ende</b>                                                                                                                                                                                                                                                                                                                                                                                                                                  |
