# Supplementary material for: Umsetzbarkeit des interdisziplinären multimodalen Assessments – die Teamperspektive
Source: Springer Nature journal article supplement (doi:10.1007/s00482-024-00796-z), 2024-04-09
Supplement: MOESM2 [file 26959478]

## Online-Zusatzmaterial 2: Rollen und Aufgaben Moderation

| <b>Rolle/Aufgaben in Vorbereitung auf die Arbeitsphase</b>                                                                                                                                                                                                                                                                                                                                                                                                                                                                                                                                                                                                                                                                                                                                                                                                                                                                                                                                                                                                                                                                                                                                                                                                                                                                            |
|---------------------------------------------------------------------------------------------------------------------------------------------------------------------------------------------------------------------------------------------------------------------------------------------------------------------------------------------------------------------------------------------------------------------------------------------------------------------------------------------------------------------------------------------------------------------------------------------------------------------------------------------------------------------------------------------------------------------------------------------------------------------------------------------------------------------------------------------------------------------------------------------------------------------------------------------------------------------------------------------------------------------------------------------------------------------------------------------------------------------------------------------------------------------------------------------------------------------------------------------------------------------------------------------------------------------------------------|
| <ul style="list-style-type: none"><li>• Vorbereitung des benötigten Materials (u.a. zur Visualisierung, als Hilfsmaterial) und weiterer organisatorischer Maßnahmen</li><li>• Inhaltliche Vorbereitung mit Fokussierung auf die vorformulierten Fragestellungen</li><li>• ggf. räumliche Gestaltung</li></ul>                                                                                                                                                                                                                                                                                                                                                                                                                                                                                                                                                                                                                                                                                                                                                                                                                                                                                                                                                                                                                         |
| <b>Rolle/Aufgaben während der Arbeitsphase</b>                                                                                                                                                                                                                                                                                                                                                                                                                                                                                                                                                                                                                                                                                                                                                                                                                                                                                                                                                                                                                                                                                                                                                                                                                                                                                        |
| <p>Umsetzung/Organisation:</p> <ul style="list-style-type: none"><li>• Einführung in die Durchführung und der Inhalte der Arbeitsphase</li><li>• Einhaltung des festgelegten Zeitplans und der geplanten Struktur, ggf. flexible Anpassung</li><li>• Geplante Ziele im Blick behalten und erreichen, Fragestellungen für die Arbeitsphase vorstellen; Klarheit der Aufgabenstellung erfragen</li><li>• Dokumentation/Visualisierung aller benannten Aspekte bzw. konkreten Ergebnisse (z.B. Karteikarten, Metaplanwand), auch durch die Teilnehmenden möglich</li><li>• Regeln erklären (z.B. ein Gedanke pro Karte, Schrift, Kurzsatz...)</li></ul> <p>Gesprächsführung – Leiten der Diskussion:</p> <ul style="list-style-type: none"><li>• Fokussierung der Teilnehmenden auf die Fragestellung</li><li>• Abweichter und Vielredner „einfangen“ und auf den Punkt bringen</li><li>• stille TN einbeziehen, dominante Teilnehmende bremsen</li><li>• mögliche Widerstände konstruktiv bearbeiten</li><li>• Einladen zum Einkreisen, Markieren oder Hervorheben von wichtigen Aspekten und Durchstreichen von als unwichtig empfundenen Aspekten</li><li>• Eigene Meinung und Informationen zurückhalten; den Prozess nicht stören, sondern begleiten; jede Meinung als wichtig bewerten und die Gruppe entscheiden lassen</li></ul> |
| <b>Rolle/Aufgaben zum Ende der Arbeitsphase</b>                                                                                                                                                                                                                                                                                                                                                                                                                                                                                                                                                                                                                                                                                                                                                                                                                                                                                                                                                                                                                                                                                                                                                                                                                                                                                       |
| <ul style="list-style-type: none"><li>• Zusammenfassung der besprochenen Aspekte und Ergebnisse, ggf. inkl. Überleitung zur nächsten Gruppe</li><li>• Dokumentation aller Arbeitsschritte (z.B. schriftlich, via Audio, via Foto)</li></ul>                                                                                                                                                                                                                                                                                                                                                                                                                                                                                                                                                                                                                                                                                                                                                                                                                                                                                                                                                                                                                                                                                           |
