# Supplementary material for: Umsetzbarkeit des interdisziplinären multimodalen Assessments – die Teamperspektive
Source: Springer Nature journal article supplement (doi:10.1007/s00482-024-00796-z), 2024-04-09
Supplement: MOESM3 [file 26959478]

# Online-Zusatzmaterial 3 – Bilddateien und Auswertungstabellen

## Dokumentation der Arbeitsphase 1

### Medizin

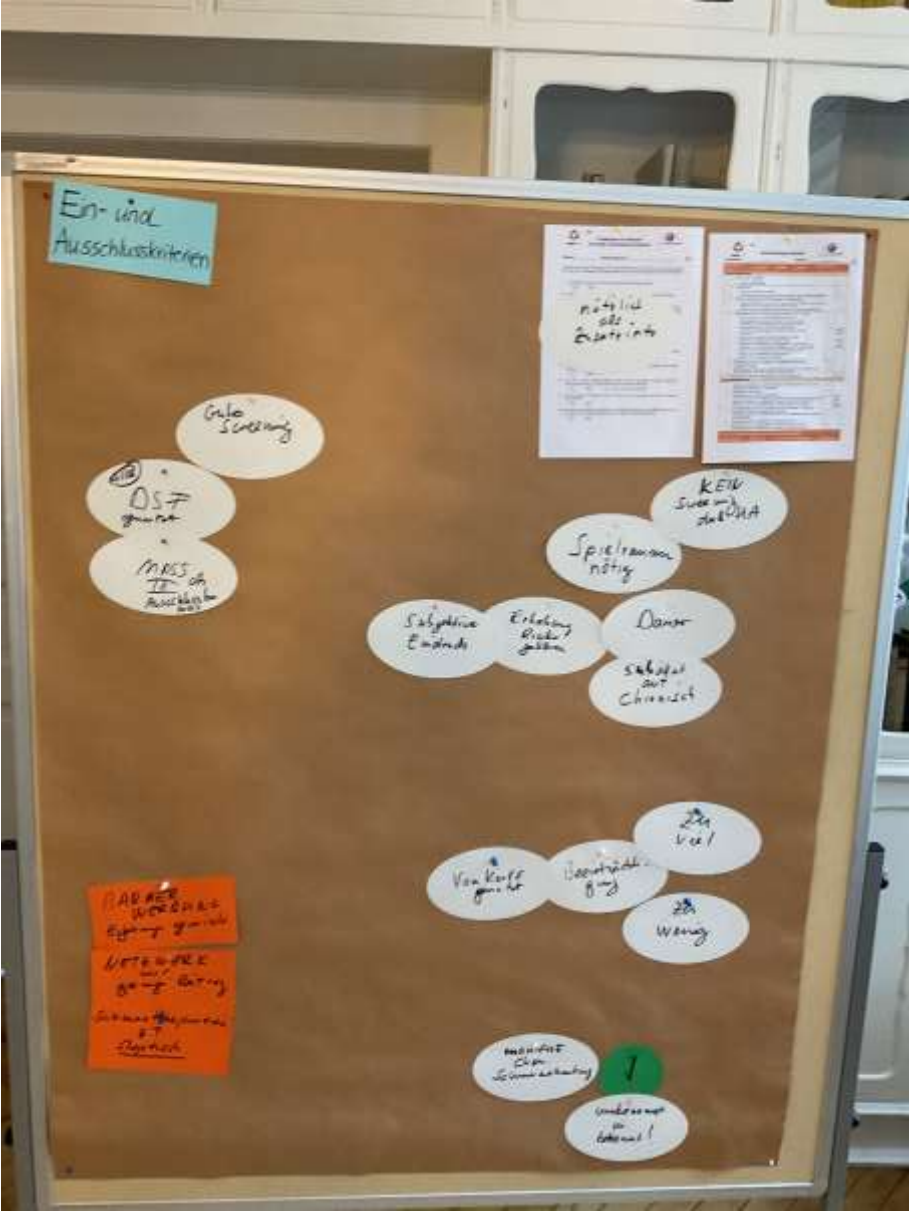



## Vor-/ und Nachteile Patientenspezifische Funktionsskala (PSFS)

| <b>Vorteile</b>            |                       |
|----------------------------|-----------------------|
| <b>Erhebung<br/>-ja-</b>   | <p>Momentaufnahme</p> |
| <b>Erhebung<br/>-nein-</b> |                       |
| <b>Nachteile</b>           |                       |

- \*für TH einen Eindruck von der Einschränkung des P. zu bekommen
  - \*Skala ungleich Schmerzskala (10=volle Funktion)
  - \*Fokus weg vom Schmerz
  - \*Fokus auf Funktion
  - \*wenig Einarbeitung
  - \*praktikabel
  - \* schnell durchführbar
  - \* Verlaufsmessung
  - \*hilfreich für die Kommunikation mit P.
  - \*nützlich für die Zielstellung mit P.
  - \*Eduktion
- 
- \*Numerische Skala verkehrt zu bekannten Skalen → Pat. haben Schwierigkeit

## Vor-/ und Nachteile der Einschätzung zu den vorrangigen Hypothesen zum Schmerz

| <b>Vorteile</b>            |                       |
|----------------------------|-----------------------|
| <b>Erhebung<br/>-ja-</b>   | <p>Momentaufnahme</p> |
| <b>Erhebung<br/>-nein-</b> |                       |
| <b>Nachteile</b>           |                       |

- \*erste Einschätzung für Teamsitzung – *Teamsitzung ergänzt bzw. ändert teilweise die Einschätzung; ermöglicht bessere Vorbereitung*
  - \*neues Denkmodell
  - \*Erweiterung des Blicks (nicht nur Input)
  - \*hilfreich für die Behandlungsmethode
  - \*Einordnung der Befunde
- 
- \*welche Anzeichen können für die Einschätzung hilfreich sein
  - \*Definition der einzelnen Begriffe nicht ganz klar (Zusatz: im Verlauf von nicht verständlich → verständlich)
  - \*Einarbeitung notwendig \*\*
  - \*ggf. nicht alle Ebenen berücksichtigt

## Psychologie

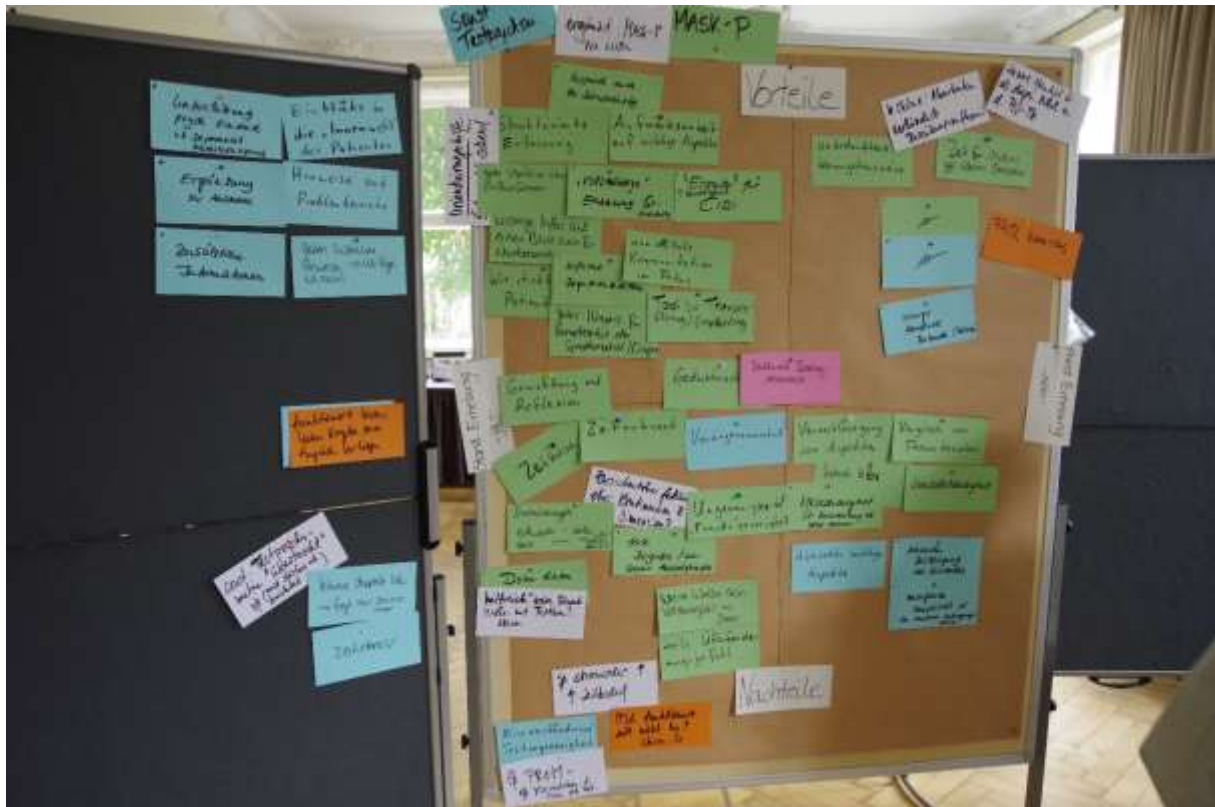

Vorteile standardisierte Erhebung vs. nicht-standardisierte Erhebung im Rahmen der psychologischen Anamnese im IMA

| Standardisierte Erhebung -ja- [sowohl MASK-P, als auch sonstige TPV] | standardisierte Erhebung -nein-                                                              |
|----------------------------------------------------------------------|----------------------------------------------------------------------------------------------|
| Orientierungshilfe/Struktur setzend                                  | unbedarfte Herangehensweise                                                                  |
| hilfreich auch bei Berufseinstieg                                    | [kein] sklavisches Abarbeiten/verhindert [sonst] Beziehungsaufbau                            |
| Strukturierte Erfassung                                              | innere Offenheit [sinkt]; [innere Offenheit] als diagnostisches Mittel in der Psychotherapie |
| Aufmerksamkeit auf wichtige Aspekte [richtend]                       | Zeit für Anderes [,] ggf. offenes Gespräch                                                   |
| guter Überblick über Einflussfaktoren                                | PHQ kann raus                                                                                |
| "vollständige" Erhebung S[chmer]z-verarbeitung                       | weniger komplexe Befunde (Zeiters[parnis])                                                   |
| "Ersatz" [entspricht] Wichtigkeit für CID1                           | [keine]                                                                                      |
| Wichtige Infos auf einen Blick auch für Nachbehandler                | [keine]                                                                                      |
| Wie "tickt" der Patient                                              |                                                                                              |
| Hilfreiche Begrifflichkeiten                                         |                                                                                              |
| nonverbale Kommunikation im Fokus                                    |                                                                                              |
| guter Hinweis auf Komplexität der Symptomatik/Diagnose               |                                                                                              |

|                                                                              |  |
|------------------------------------------------------------------------------|--|
| Tool zur Therapieplanung/Empfehlung                                          |  |
| Gewichtung zur Reflexion                                                     |  |
| Gedächtnisstütze                                                             |  |
| strukturierte Schmerzanamnese                                                |  |
| [folgende Felder beziehen sich auf Testpsychometrie allgemein]               |  |
| Unterstützung psych[ischer] Eindruck, z.B. Depressivität, Katastrophisierung |  |
| Einblick in die Innenwelt des Patienten                                      |  |
| Ergänzung zur Anamnese                                                       |  |
| Hinweise auf Problembereiche                                                 |  |
| zusätzliche Informationen                                                    |  |
| geben zusätzliche Hinweise [Pfeil] wo frage ich nach?                        |  |

#### Nachteile standardisierter und nicht-standardisierter Erhebung

| Standardisierte Erhebung -ja- [sowohl MASK-P, als auch sonstige TPV]           | standardisierte Erhebung -nein-                             |
|--------------------------------------------------------------------------------|-------------------------------------------------------------|
| Zeitkritisch                                                                   | Vernachlässigung von Aspekten                               |
| Zeitaufwand                                                                    | Vergessen von Themenblöcken                                 |
| Voreingenommenheit                                                             | fehlende Infos                                              |
| "Formulierungen" entweder - oder, statt was denkt Patient                      | Unvollständigkeit                                           |
| Zwischentöne [in MASK-P] fehlen; eher Kontinuum oder Dimension?                | Vielschichtigkeit S[chmer]z-Verarbeitung etc. geht verloren |
| Ungenauigkeit/Pseudogenauigkeit                                                | Übersehen wichtiger Aspekte                                 |
| feste Begriffe/sehr starke Ausprägungen [in MASK-P]                            | fehlende Bestätigung des Eindrucks                          |
| Doku dazu                                                                      | Mangelnde Komplexität für ein komplexes Bedingungsgefüge    |
| [zu Doku ergänzend] hilfreich wäre Eingabe-Maske mit Textbausteinen            |                                                             |
| wenn Wunsch nach Vollständigkeit [in der Bearbeitung zur MASK-P] [dann] Stress |                                                             |
| [zu wenn Wunsch...] teils Überforderungsgefühl                                 |                                                             |
| je chronischer [desto mehr] Zeitbedarf                                         |                                                             |
| IMA funktioniert zeitlich nicht bei [zunehmendem] chronischen Schmerz          |                                                             |
| sonstige Testpsychometrie "überrascht" oft (meist stärker als berichtet)       |                                                             |
| teilweise doppelte Infos [Pfeil] fragt man sowieso                             |                                                             |
| zeitintensiv                                                                   |                                                             |





Kriterien „Schweregrad Störungsbild“, „Bedeutung für die Schmerzproblematik“ und „IMST/Spezifischer Therapiebedarf“ – Medizinische (somatische) Perspektive

| <b>Kriterien Schweregrad Störungsbild [hier ergänzt: „klar“ somatisch]</b>                                                                                                                                        | <b>Kriterien Bedeutung für die Schmerzproblematik</b>                                     | <b>Kriterien IMST/Spezifischer Therapiebedarf</b>                                                                                                   |
|-------------------------------------------------------------------------------------------------------------------------------------------------------------------------------------------------------------------|-------------------------------------------------------------------------------------------|-----------------------------------------------------------------------------------------------------------------------------------------------------|
| Gespräch                                                                                                                                                                                                          | Bewegungsmuster/-ängste<br>Vermeidungsverhalten (Physisch)                                | Motivation                                                                                                                                          |
| Untersuchung<br>Klin[ischer] Befund<br>Bewegungseinschränkungen (FBA [Finger-Boden-Abstand], WS [Wirbelsäulenbeweglichkeit])<br>Körperliche/motorische/neurologische Ausfälle [in der Diskussion zusammengefasst] | Korrelation messbarer Bewegungsspielraum [mit] subjektive geschilderte[n] Einschränkungen | Zugänglich für multimodalen Ansatz                                                                                                                  |
| Ergebnisse der Vordiagnostik<br>Vorbefunde (orth[opädisch] Bildgebung)                                                                                                                                            | Regelmäßige/häufige Medikamenteneinnahme                                                  | Zeigt sich eine „multimodale Problematik?“ (Bereits v[or] d[em] Teamgespräch)                                                                       |
| Psychiatrische Zusatzkrankungen                                                                                                                                                                                   | Häufige Diagnostik<br>Inanspruchnahme des Gesundheitssystems                              | Diskrepanz Störungsbild und subj[ektive]Bedeutung für Pat[ienten]                                                                                   |
| Therapie-/Handlungsbedarf                                                                                                                                                                                         | Alleinige somatische Therapie                                                             | Hinweis auf affektives Schmerzerleben                                                                                                               |
| Somatische Beeinträchtigung (f[ür] körperl[iche] Belastung)                                                                                                                                                       | Korrelation Befund und Sz [Schmerz]                                                       | Muss ein „spezielles Problem“ gelöst werden (z.B. Psych., OP...)                                                                                    |
| MPSS v. Korff                                                                                                                                                                                                     | Aus Störungs[modell], Beeintr[ächtigung], Leidensdr[uck]                                  | Beeinträchtigung im Alltag (o[der] Hausarbeit)                                                                                                      |
|                                                                                                                                                                                                                   | MPSS v. Korff                                                                             | „schlechtes“ Coping<br>Umgang mit Sz [Schmerz] dysfunktional                                                                                        |
|                                                                                                                                                                                                                   |                                                                                           | (drohende)<br>Beeinträchtigung in der Berufsausübung                                                                                                |
|                                                                                                                                                                                                                   |                                                                                           | Subjektiver Leidensdruck                                                                                                                            |
|                                                                                                                                                                                                                   |                                                                                           | „Schulung“/„Eduktion“ [im Sinne von Bedarf für]                                                                                                     |
|                                                                                                                                                                                                                   |                                                                                           | Psychosoziale Einflussgrößen [und] fehl[ender] funktion[eller] Umgang [und] Potential über Kenntnisse der SM [Schmerzmechanismen] f[ür] Veränderung |
|                                                                                                                                                                                                                   |                                                                                           | Sz [Schmerz]-Erleben: Bedrohung                                                                                                                     |
| <b>Übergeordnete Kriterien für Wichtigkeit/Sicherheit:</b><br>Anamnese<br>Untersuchungsbefund                                                                                                                     | <b>Übergeordnete Kriterien für Wichtigkeit/Sicherheit [bei Fokussierung auf</b>           | <b>Übergeordnete Kriterien für Wichtigkeit/Sicherheit:</b><br>Psychosoziale Faktoren deutlich                                                       |

|                   |                                                                                                                                                                                                                                                                                                 |                                                                                                                                                                                                 |
|-------------------|-------------------------------------------------------------------------------------------------------------------------------------------------------------------------------------------------------------------------------------------------------------------------------------------------|-------------------------------------------------------------------------------------------------------------------------------------------------------------------------------------------------|
| <p>Vorbefunde</p> | <p><b>somatisches Störungsbild:</b><br/>         Medikamenten-Einnahme<br/>         Inanspruchnahme/<br/>         Arbeitsunfähigkeit<br/>         Korrelation Befund und Schmerz<br/>         Aus Störungsmodell result[ierend]:<br/>         Beeintr[ächtigung],<br/>         Leidensdruck</p> | <p>Aufgeschlossenheit für Therapie (IMST) [bei Diskussion der Wichtigkeit (s.u.) neu formuliert]<br/>         Zeigt sich eine „multimodale Problematik?“ (Bereits v[or] d[em] Teamgespräch)</p> |
|-------------------|-------------------------------------------------------------------------------------------------------------------------------------------------------------------------------------------------------------------------------------------------------------------------------------------------|-------------------------------------------------------------------------------------------------------------------------------------------------------------------------------------------------|

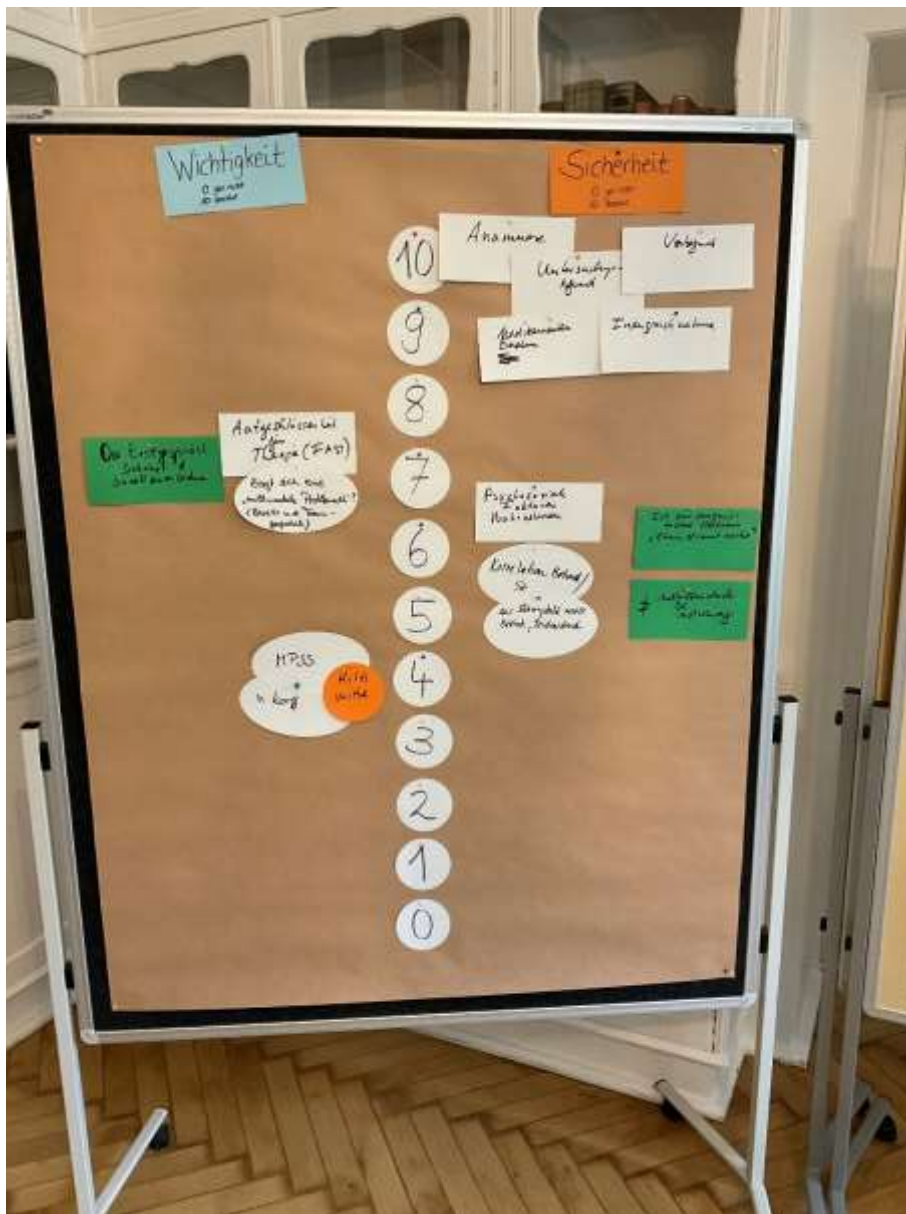



Wichtigkeit/Sicherheit – Medizinische (somatische) Perspektive

| Wichtigkeit [W] und Sicherheit [S] ausgewählter Kriterien<br>[Übergeordnete Kriterien] |                                                                                                                                                             |                                                                                                               |                                                                                                  |
|----------------------------------------------------------------------------------------|-------------------------------------------------------------------------------------------------------------------------------------------------------------|---------------------------------------------------------------------------------------------------------------|--------------------------------------------------------------------------------------------------|
|                                                                                        | Wichtigkeit                                                                                                                                                 | Sicherheit                                                                                                    |                                                                                                  |
| 10                                                                                     | Anamnese<br>Untersuchungsbefund<br>Vorbefunde                                                                                                               | Anamnese<br>Untersuchungsbefund<br>Vorbefunde<br>Medikamenteneinnahme                                         |                                                                                                  |
| 9                                                                                      | Psychosoziale Faktoren<br>wahrnehmen [statt<br>wichtig]                                                                                                     | Inanspruchnahme                                                                                               |                                                                                                  |
| 8                                                                                      | Medikamenteneinnahme<br>Inanspruchnahme<br>Korrelation Befund/Sz<br>[Schmerz]<br>Aus Störungsbild<br>result[ierend]:<br>Beeintr[ächtigung],<br>Leidensdruck |                                                                                                               |                                                                                                  |
| 7                                                                                      | Aufgeschlossenheit für<br>Therapie (IMST)<br>Zeigt sich eine<br>„multimodale<br>Problematik?“ (Bereits<br>v[or] d[em]<br>Teamgespräch)                      |                                                                                                               | [Ergänzung auf<br>Metaebene:]<br>Da Erstgespräch<br>Sicherheit Ø [nicht]<br>sinnvoll einzuordnen |
| 6                                                                                      |                                                                                                                                                             | Psychosoziale Faktoren<br>wahrnehmen [statt wichtig]                                                          | [Ergänzung auf<br>Metaebene:]<br>Ist ein diagnostisches<br>Kriterium:                            |
| 5                                                                                      |                                                                                                                                                             | Korrelation Befund/Sz<br>[Schmerz]<br>Aus Störungsbild result[ierend]:<br>Beeintr[ächtigung],<br>Leidensdruck | „Etwas stimmt nicht“<br>entspricht nicht mehr<br>somatische Dx<br>[Diagnostik] notwendig         |
| 4                                                                                      | MPSS<br>v. Korff [nur Hilfsmittel]                                                                                                                          |                                                                                                               |                                                                                                  |
| 3                                                                                      |                                                                                                                                                             |                                                                                                               |                                                                                                  |
| 2                                                                                      |                                                                                                                                                             |                                                                                                               |                                                                                                  |
| 1                                                                                      |                                                                                                                                                             |                                                                                                               | [                                                                                                |
| 0                                                                                      |                                                                                                                                                             |                                                                                                               |                                                                                                  |

# Physiotherapie

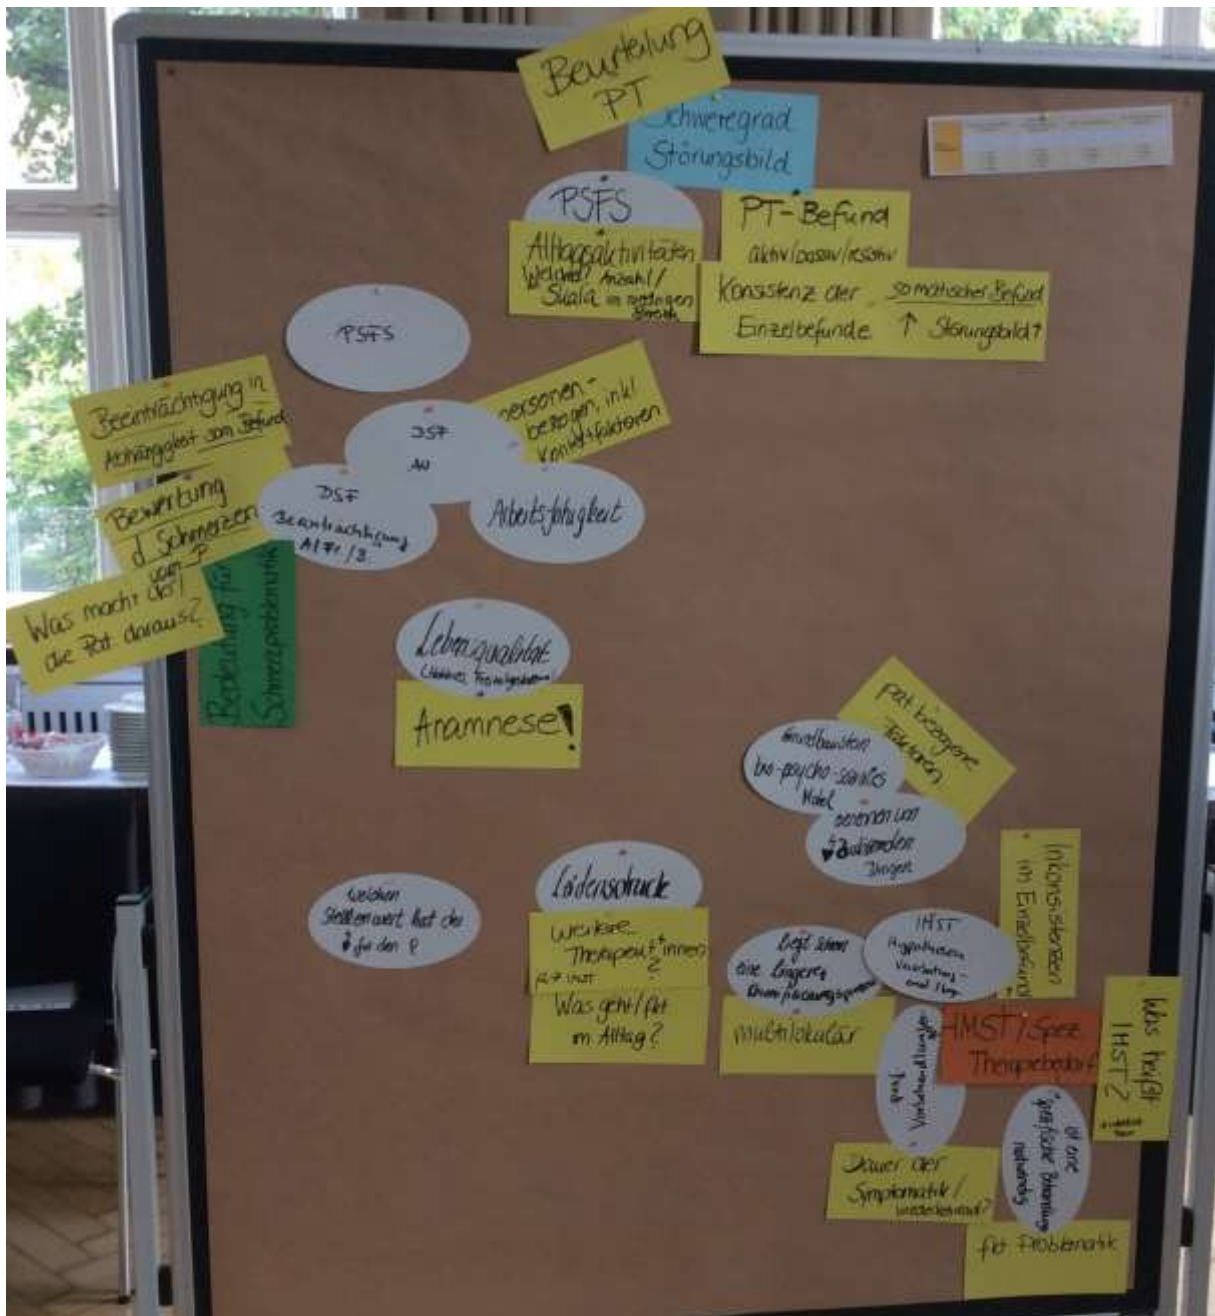

Kriterien „Schweregrad Störungsbild“, „Bedeutung für die Schmerzproblematik“ und „IMST/Spezifischer Therapiebedarf“ –Physiotherapeutische (funktionelle) Perspektive

| Kriterien Schweregrad Störungsbild [hier ergänzt: „klar“ funktionell]                                    | Kriterien Bedeutung für die Schmerzproblematik                                                                                                                                                                                                                                                                   | Kriterien IMST/Spezifischer Therapiebedarf                                                                                    |
|----------------------------------------------------------------------------------------------------------|------------------------------------------------------------------------------------------------------------------------------------------------------------------------------------------------------------------------------------------------------------------------------------------------------------------|-------------------------------------------------------------------------------------------------------------------------------|
| PSFS<br>- Alltagsaktivitäten – Welche (Art)?<br>- Alltagsaktivitäten – Wofür?<br>Beruf, Freizeit, Alltag | DSF Beeinträchtigung A/Fr/B                                                                                                                                                                                                                                                                                      | spez. Vorbehandlungen [in der Vorgeschichte, dann eher zu IMST]                                                               |
| PT-Befund aktiv/passiv/resistiv                                                                          | DSF AU                                                                                                                                                                                                                                                                                                           | Dauer der Symptomatik/wiederkehrend [auch als Beschreibung für IMST verwendet]                                                |
| Konsistenz der Einzelbefunde                                                                             | Arbeitsfähigkeit (z.B. „Müssen Stunden reduziert werden?“, „Ist ein 8-Stunden-Tag zu bewältigen?“, „Muss am Arbeitsplatz häufig die Tätigkeit gewechselt werden?“, „Muss ich mich immer wieder krankmelden?“, „Wie entscheidend ist das Arbeiten für die Personen?“)<br>- personenbezogen, inkl. Kontextfaktoren |                                                                                                                               |
| somatischer Befund – Störungsbild hoch                                                                   | Lebensqualität (Hobbies, Freizeitgestaltung (Freizeitaktivitäten), Freunde (sozialer Rückzug)<br><br>Haltung zum Gesundheitsverhalten/ Bewegungsverhalten<br><br>Ressourcen? – funktionell/körperlich, [Ergänzungen zu Ressourcen auch aus dem Team]                                                             | liegt schon ein längerer Chronifizierungsprozess vor?<br><br>multilokulär                                                     |
|                                                                                                          |                                                                                                                                                                                                                                                                                                                  | IMST Hypothesen Verarbeitung emot./kognitiv                                                                                   |
|                                                                                                          |                                                                                                                                                                                                                                                                                                                  | Inkonsistenzen im Einzelbefund [würde für eine IMST sprechen, auch unterschiedliche Angaben innerhalb der drei Berufsgruppen] |
|                                                                                                          |                                                                                                                                                                                                                                                                                                                  | Ist eine spezifische Behandlung notwendig? → funktionelle Problematik                                                         |
| PSFS (Schweregrad > Schmerzproblematik)                                                                  |                                                                                                                                                                                                                                                                                                                  |                                                                                                                               |

|                                                                                                         |                                                                                                                                                                                                                                                                                                     |                                                                                                                                                                                                                                                                                                                                                                                                                                                                                                                                                                                                                                                                         |
|---------------------------------------------------------------------------------------------------------|-----------------------------------------------------------------------------------------------------------------------------------------------------------------------------------------------------------------------------------------------------------------------------------------------------|-------------------------------------------------------------------------------------------------------------------------------------------------------------------------------------------------------------------------------------------------------------------------------------------------------------------------------------------------------------------------------------------------------------------------------------------------------------------------------------------------------------------------------------------------------------------------------------------------------------------------------------------------------------------------|
|                                                                                                         | Welchen Stellenwert hat der Schmerz für den Pat.? ( <i>Bedeutung&gt;IMST</i> )                                                                                                                                                                                                                      |                                                                                                                                                                                                                                                                                                                                                                                                                                                                                                                                                                                                                                                                         |
|                                                                                                         | Leidensdruck                                                                                                                                                                                                                                                                                        |                                                                                                                                                                                                                                                                                                                                                                                                                                                                                                                                                                                                                                                                         |
|                                                                                                         | Pat.bezogene Faktoren<br>- Grundbaustein bio-psycho-soziales Modell<br>- Benennen von schmerzauslösenden Dingen [ <i>in Bezug auf Bewegungen, Aktivitäten, Druck (mechanisch), Stressfaktoren, Einflussfaktoren auf den Schmerz; als Einschätzung, ob ein bio-psycho-soziales Modell vorliegt</i> ] |                                                                                                                                                                                                                                                                                                                                                                                                                                                                                                                                                                                                                                                                         |
| <b>Beschreibung</b><br>(zusammenfassend)<br>Schweregrad Störungsbild [hier ergänzt: "klar" funktionell] | <b>Beschreibung</b><br>(zusammenfassend) Bedeutung für die Schmerzproblematik                                                                                                                                                                                                                       | <b>Beschreibung</b><br>(zusammenfassend) IMST/Spezifischer Therapiebedarf                                                                                                                                                                                                                                                                                                                                                                                                                                                                                                                                                                                               |
| Beurteilung PT ( <i>orientiert am somatischen Befund</i> )                                              | Beeinträchtigung des Pat. in Abhängigkeit som. Befund                                                                                                                                                                                                                                               | - keine Beschreibung aus PT-Kleingruppe vorhanden, da Teil vom Teamprozess<br>- mehrfach beschrieben als "Brauche ich noch eine weitere Person?"<br>- "übergeordneter Bedarf", multilokuläre Schmerzen, Länge der Symptomatik ( <i>wiederkehrend?</i> ), Übertrag in den Alltag nicht gegeben, vorherige Therapien nicht hilfreich ( <i>weitere Strategien und Tipps der anderen Berufsgruppen notwendig</i> ), fkt. Problematik gering ( <i>Störungsbild und Bedeutung für die Schmerzproblematik niedrig und trotzdem hohe Schmerzen --&gt; eher Empfehlung für IMST</i> )<br>- Unterscheidung zwischen Durchhalter/Vermeider? --> kein zwingendes Kriterium für IMST |



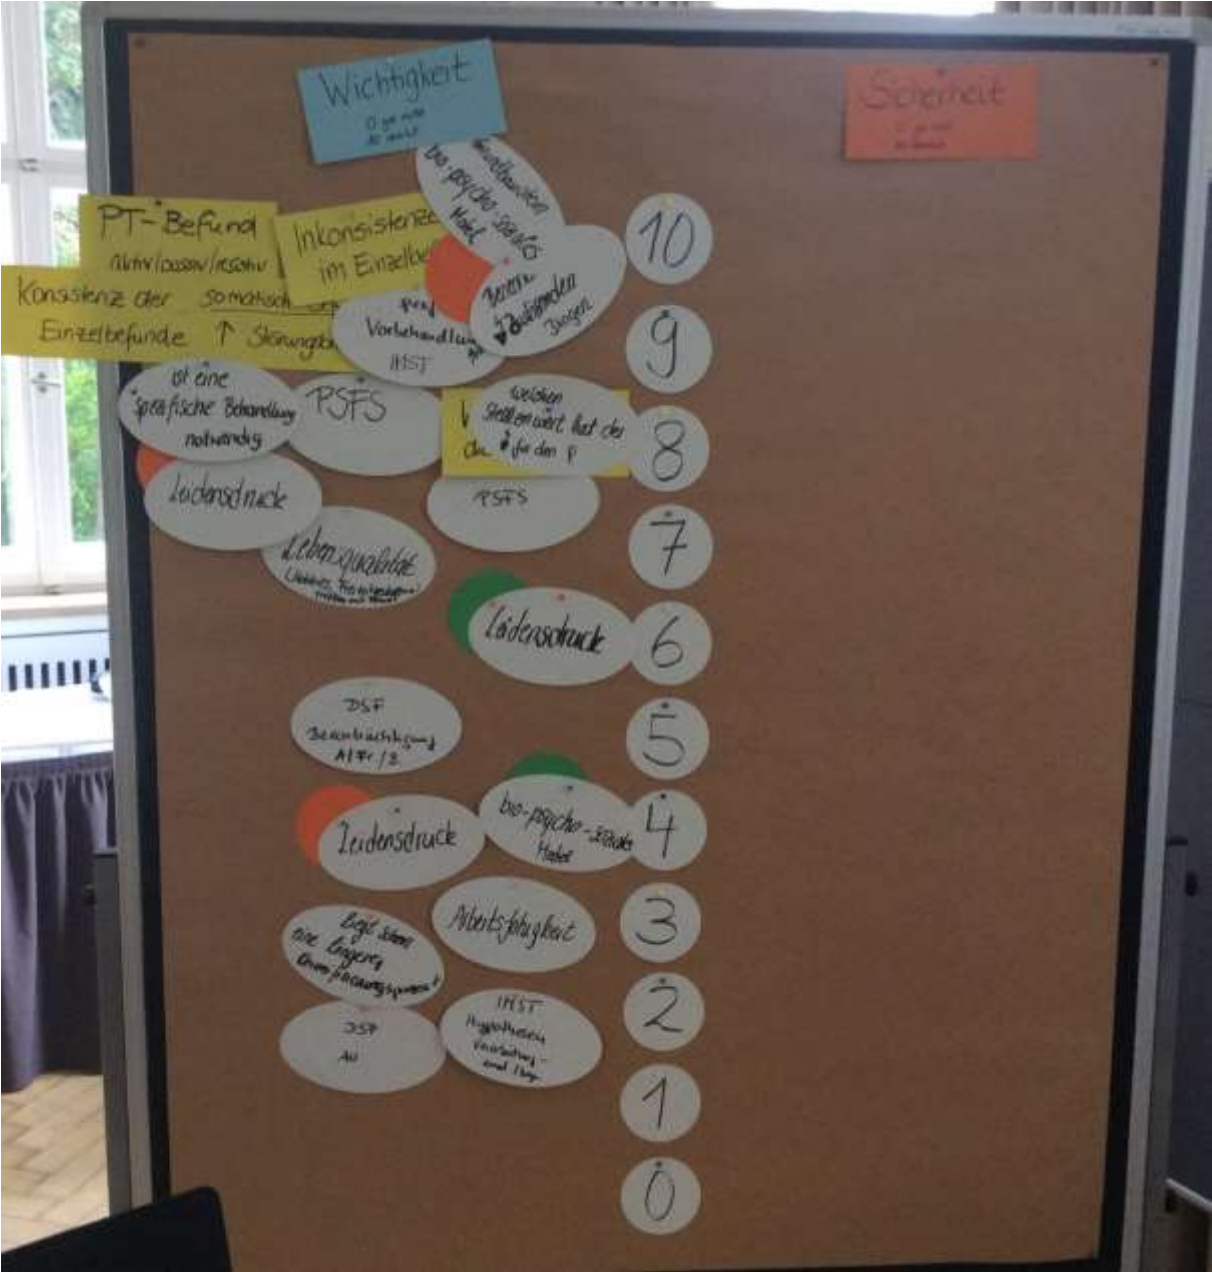

Wichtigkeit  
0 gar nicht  
10 maximal

Sicherheit  
0 gar nicht  
10 maximal

Somatischer Befund  
↑ Störungsbild?

Leidensdruck

PSFS

10

DSF  
Au  
DSF  
Betrachtung  
AI + B.

PSFS

PT-Befund  
aktiv/passiv/risik

Verhaltensbeobach-  
tung

9

Grundannahmen  
bio-psycho-soziales  
Modell

ist eine  
spezifische Behandlung  
notwendig

Vorbek-  
urteilung  
HST

Qualität der Brücke  
Anamneseinterview

8

7

6

Lebensqualität  
Lebens-  
Trennung  
Trennung mit Eltern

5

bio-psycho-soziales  
Modell

4

3

liegt schon  
eine längere  
Therapiegeschichte

Welchen  
Stellenwert hat der  
P für den P

HST  
Hypothesen  
Verstärkung  
und Lern

2

Leidensdruck

Leidensdruck

Arbeitsfähigkeit

1

0

TEAMPROZESS ASSESSMENT  
aus 2008

Verminder-  
te  
Lebens-  
Ressourcen-  
2008

Wichtigkeit/Sicherheit – Physiotherapeutische (funktionelle) Perspektive

|      | Wichtigkeit                                                                                                                                          | Sicherheit                                                                                                                                                                                                                                           |
|------|------------------------------------------------------------------------------------------------------------------------------------------------------|------------------------------------------------------------------------------------------------------------------------------------------------------------------------------------------------------------------------------------------------------|
| 10   | *Grundbaustein bio-psycho-soziales Modell<br>[aus IMST-Bedarf]<br>*PT-Befund aktiv/passiv/resistiv<br>*Inkonsistenzen im Einzelbefund                | *DSF AU [aus dem DSF zu entnehmen]<br>*DSF Beeinträchtigung A/Fr/B [aus dem DSF zu entnehmen]<br>*PT-Befund aktiv/passiv/resistiv [darunter: Inkonsistenzen im Einzelbefund) + Konsistenz der Einzelbefunde]<br>*Neu: Verhaltensbeobachtung<br>*PSFS |
| 9/10 | *Benennen schmerzauslösender Dinge                                                                                                                   |                                                                                                                                                                                                                                                      |
| 9    | *Konsistenz der Einzelbefunde<br>*somatischer Befund – Störungsbild hoch<br>*spez. Vorbehandlung (gehört zu IMST)                                    | *Ist eine spezifische Behandlung notwendig?                                                                                                                                                                                                          |
| 8/9  |                                                                                                                                                      | *Grundbaustein bio-psycho-soziales Modell<br>[aus IMST-Bedarf]<br>*Benennen von schmerzauslösenden Dingen                                                                                                                                            |
| 8    | *PSFS [Störungsbild]<br>*ist eine spezifische Behandlung notwendig<br>*Welchen Stellenwert hat der Schmerz für den P.?/Was macht der/die Pat. daraus | *spez. Vorbehandlung; Neu: Qualität der Behandlung, Aktivitätsniveau                                                                                                                                                                                 |
| 7/8  | *PSFS [Bedeutung für die Schmerzproblematik]<br>*Leidensdruck                                                                                        |                                                                                                                                                                                                                                                      |
| 7    | *Lebensqualität (Hobbys, Freizeitgestaltung, Treffen mit Freunden)                                                                                   |                                                                                                                                                                                                                                                      |
| 6    | *Leidensdruck                                                                                                                                        | *Lebensqualität (Hobbys, Freizeitgestaltung, Treffen mit Freunden)                                                                                                                                                                                   |
| 5    | *DSF Beeinträchtigung A/Fr/B                                                                                                                         | *bio-psycho-soziales Modell [aus Bedeutung für Schmerzproblematik]                                                                                                                                                                                   |
| 4    | *bio-psycho-soziales Modell [aus Bedeutung für Schmerzproblematik]                                                                                   |                                                                                                                                                                                                                                                      |
| 3    | *Arbeitsfähigkeit<br>*liegt schon ein längerer Chronifizierungsprozess vor                                                                           | *liegt schon ein längerer Chronifizierungsprozess vor<br>*Welchen Stellenwert hat der Schmerz für den P.?/Was macht der/die Pat. daraus                                                                                                              |
| 2    | *DSF – AU<br>*IMST Hypothesen: Verarbeitung emot./kognitiv                                                                                           | *Leidensdruck<br>*IMST Hypothesen Verarbeitung emot./kognitiv                                                                                                                                                                                        |
| 1    |                                                                                                                                                      | *Arbeitsfähigkeit                                                                                                                                                                                                                                    |
| 0    |                                                                                                                                                      |                                                                                                                                                                                                                                                      |





Kriterien „Schweregrad Störungsbild“, „Bedeutung für die Schmerzproblematik“ und „IMST/Spezifischer Therapiebedarf“ – Psychologische (psychosoziale) Perspektive

| Schweregrad Störungsbild [hier ergänzt: "klar" Psychisch]                                                                                                                                                                                                       | Bedeutung für die Schmerzproblematik                                                                          | IMST/Spezifischer Therapiebedarf                                                |
|-----------------------------------------------------------------------------------------------------------------------------------------------------------------------------------------------------------------------------------------------------------------|---------------------------------------------------------------------------------------------------------------|---------------------------------------------------------------------------------|
| [eindeutig; absteigend von Nähe in die Distanz; dieselbe Ebene in einem Feld]                                                                                                                                                                                   | Psychosoziale Belastung wesent[licher] Mediator für Schmerzausprägung                                         | verschiedene Ebenen relevant oder "nur" 1?                                      |
| psychosoziale Belastungsfaktoren<br><br>Hinweise auf psychische Erkrankungen                                                                                                                                                                                    | sozialer Kontext: [Waage zwischen] Ressourcen/Gesundheitskompetenz [und] Störungsbild/Belastung               | [Waage] Schmerz [und] psychosoziale Beeinträchtigung                            |
| subjektiver Leidensdruck<br>Auswirkungen auf das Denken (d[en] Schmerz); Fühlen und Verhalten<br>Beeinträchtigung<br>Alltag/Arbeit/Freizeit [dazu sortiert:] Funktionsniveau; für mich eher Funktionsniveau und Erschöpfungserleben; Ausmaß der Einschränkungen | je mehr [der Ressourcen; siehe Waage] desto weniger Bedeutsamkeit f[ür] S[chmerz]P[roblematik]                | Passung Person zu IMST<br>Inhalten                                              |
| Dauer der Beschwerden                                                                                                                                                                                                                                           | [Bezug zu Prognosen- gegenüber gestellt]                                                                      | Gefahr der Chronifizierung                                                      |
| Biopsychosoziale Belastungsfaktoren [hier sortiert:] Anzahl [und] Ausprägung psychol[ogischer] Faktoren; somatische Faktoren/was spielt [unleserlich]eine Rolle?                                                                                                | Gute Prognose [dazu sortiert:] zeitnahe Lösung; Abgrenzbarkeit der psychosoz[ialen] Beeinträchtigung          | Informierung über biopsychosoziales Schmerzmodell erscheint wichtig             |
| [auf derselben Ebene aber zu Beeinträchtigung sortiert:] Gesundheitsverhalten                                                                                                                                                                                   | schlechte Prognose [dazu sortiert:] wenig/keine Lösungsoption; breites/komplexes Problem- bzw. Belastungsfeld | Ausmaß an Ressourcen für den Transfer                                           |
| Stressniveau/hohes Anspannungsniveau                                                                                                                                                                                                                            | [zusammenfassend zur Prognose:]                                                                               | [konkret für spezifischen Therapiebedarf ausgewiesen:]                          |
| [direkt im Übergang von Schweregrad Störungsbild zu Bedeutung für die Schmerzproblematik:]                                                                                                                                                                      | [wenig] Ressourcen; innere, äußere; "wie ist der Zugang dazu"                                                 | Ablehnung psychische Ansätze [meint ANDERE Angebote als Psycho]                 |
| Dysfunktionale Schmerzbewältigungsart                                                                                                                                                                                                                           | Ausmaß Introspektions- und Reflexionsfähigkeit -[je mehr] desto besser-                                       | psych[ische] Erkrankung im Vordergrund                                          |
| Ausprägung Faktoren [und] Einfluss (Beispiele)                                                                                                                                                                                                                  | [Prognose und Gewichtung der Ressourcen reicht zu IMST/Spezifischer Therapiebedarf]                           |                                                                                 |
| [Metaebene: Übergang Psychosozial -->"rein Schmerz" zu Bedeutung für die Schmerzproblematik                                                                                                                                                                     |                                                                                                               | [RM Ärzte aus MDI] Dieskrepanz körperl[icher] Befund vs. emot[ionale] Belastung |



Wichtigkeit/Sicherheit – Psychologische (psychosoziale) Perspektive

| Wichtigkeit [W] und Sicherheit [S] ausgewählter Kriterien<br>["nur" Schweregrad Störungsbild und Bedeutung für die Schmerzproblematik] |                                                                           |                                                                                                                                                                                                 |                                                                                                                                  |
|----------------------------------------------------------------------------------------------------------------------------------------|---------------------------------------------------------------------------|-------------------------------------------------------------------------------------------------------------------------------------------------------------------------------------------------|----------------------------------------------------------------------------------------------------------------------------------|
|                                                                                                                                        | Wichtigkeit                                                               | Sicherheit                                                                                                                                                                                      |                                                                                                                                  |
| 10                                                                                                                                     | Subjektiver Leidensdruck                                                  | Anzahl [und] Ausprägung psychol[ogischer] Faktoren; Biopsychosoziale Belastungsfaktoren; Beeinträchtigung Alltag/Arbeit/Freizeit in Folge psychologischer Faktoren; Ausmaß der Einschränkungen; |                                                                                                                                  |
| 9                                                                                                                                      | Hinweise auf psychische Erkrankung                                        | Subjektiver Leidensdruck; Hinweise auf psychische Erkrankung                                                                                                                                    |                                                                                                                                  |
| 8                                                                                                                                      | Beeinträchtigung Alltag/Arbeit/Freizeit in Folge psychologischer Faktoren | [weniger] Ressourcen, innere, äußere, "wie ist der Zugang dazu"; Ausprägung Faktoren [und] Einfluss (Beispiele); Ausmaß Introspektions- und Reflexionsfähigkeit -[je mehr] desto besser-        | [Ergänzung auf Metaebene:] Wie groß ist dann aber der Einfluss? Genauer eher durch längere Begleitung/aber für Indikation reicht |
| 7                                                                                                                                      | Ausmaß der Einschränkungen                                                |                                                                                                                                                                                                 |                                                                                                                                  |
| 6                                                                                                                                      | Biopsychosoziale Belastungsfaktoren                                       | dysfunktionale Schmerzbewältigungsart [war vorher bei Wichtigkeit nicht dabei!]                                                                                                                 | [Ergänzung auf Metaebene:] Hier brauchts Physio/Arzt                                                                             |
| 5                                                                                                                                      | Anzahl [und] Ausprägung psychol[ogischer] Faktoren                        | Dauer der Beschwerden, Funktionsniveau                                                                                                                                                          | [Ergänzung auf Metaebene:] Hier brauchts Physio/Arzt                                                                             |
| 4                                                                                                                                      | Ausprägung Faktoren [und] Einfluss (Beispiele)                            |                                                                                                                                                                                                 |                                                                                                                                  |
| 3                                                                                                                                      |                                                                           |                                                                                                                                                                                                 |                                                                                                                                  |
| 2                                                                                                                                      | [weniger] Ressourcen, innere, äußere, "wie ist der Zugang dazu"           |                                                                                                                                                                                                 |                                                                                                                                  |
| 1                                                                                                                                      | Ausmaß Introspektions- und Reflexionsfähigkeit - [je mehr] desto besser-  | Somatische Faktoren, was spielt [unleserlich]eine Rolle?                                                                                                                                        | [Ergänzung auf Metaebene:] Physio/Arzt                                                                                           |
| 0                                                                                                                                      |                                                                           |                                                                                                                                                                                                 |                                                                                                                                  |

Arbeitsphase 3

Kriterien Therapieempfehlung

Zu S. 10 fragen

IMA -  
 Algorithmen  
 ob bekannt  
 = CAZ in Ablauf  
 - auch für A-IMA  
 anpassen

IMA - Bericht!  
 - Soll Weiterbehandlung  
 (wird Klostherapie/Behandlung  
 Störungen d. Konvergenz  
 für die Behandlung des  
 - Zwei immer fassend  
 am Ende? Anfang?

Überprüfung der Einträge  
 - Bewertung der Einträge  
 - Gruppenarbeit, d. Daten

THERAPIEEMPFEHLUNG - Welche Kriterien/Inhalte braucht es?  
 - Gruppenarbeit, d. Daten

THERAPIEEMPFEHLUNG - Welche Kriterien/Inhalte braucht es?  
 - Gruppenarbeit, d. Daten

berufsgroupings, Empfehlungen  
 als Resultat der  
 - MRS, r. temp  
 - MRS-P, Kombidifferenz (Kernar, populär, /populär)  
 - Sprachfähigkeit Gruppenarbeit  
 - kognitive Fähigkeiten  
 - kognitive Belastbarkeit  
 - Zielsetzung → Kombination d. Ref  
 - Erreichbarkeit des Zentrums / Zielsetzung  
 - zentrale Ressourcen beim Ref  
 - Kombination von Therapien möglich  
 - Kompetenz für Umsetzung der Inhalte

Diagnostik  
 Präzision  
 Team-Aspekte

offene, individualisierter Aus-  
 tausch im Team mit Angehörigen (Bereitschaften,  
 Kompetenzen, Erfahrungen)  
 - Kommunikation (genau über  
 "Nein")  
 - individuelle, maximale, Qualität  
 (wie wird es sein?)





## Teamsitzung - Interaktion

| Interaktion zwischen den Berufsgruppen im Team<br>-REAL-                                                                                                                                                                                                                                                                                                                                                                                                                                                                                                                                                                                                                          | Interaktion zwischen den Berufsgruppen im Team<br>-IDEAL-                                                                                                  |
|-----------------------------------------------------------------------------------------------------------------------------------------------------------------------------------------------------------------------------------------------------------------------------------------------------------------------------------------------------------------------------------------------------------------------------------------------------------------------------------------------------------------------------------------------------------------------------------------------------------------------------------------------------------------------------------|------------------------------------------------------------------------------------------------------------------------------------------------------------|
| den anderen Fragen stellen [u.a. zur Wahrnehmung der Patient*innen]                                                                                                                                                                                                                                                                                                                                                                                                                                                                                                                                                                                                               | s. REAL (u.a. Offenheit, Respekt)                                                                                                                          |
| "Gefahr" sich in Details zu verlieren<br>"im Kreis drehen"                                                                                                                                                                                                                                                                                                                                                                                                                                                                                                                                                                                                                        |                                                                                                                                                            |
| offenes Zuhören+Interesse für die Perspektiven der Anderen [Respekt vor der Kompetenz des anderen, Wertschätzung]                                                                                                                                                                                                                                                                                                                                                                                                                                                                                                                                                                 | wertfrei, wertschätzend, offen → Raum bekommen Gedanken zu äußern (auch bei Abweichung der eigenen Gedanken) → Offenheit für fachübergreifende Interaktion |
|                                                                                                                                                                                                                                                                                                                                                                                                                                                                                                                                                                                                                                                                                   | Raum für Anregungen gegenseitig (fachübergreifend)                                                                                                         |
| Schwierigkeiten bei der Findung der Therapieempfehlung                                                                                                                                                                                                                                                                                                                                                                                                                                                                                                                                                                                                                            |                                                                                                                                                            |
| teilweise spürbarer Zeitdruck [führt dazu, dass das Gespräch „verbal“ limitiert wird – „müssen jetzt mal zum Punkt kommen“; „Zeitdruck spielt immer eine Rolle, teilweise wird dadurch das Gespräch unterbrochen, da noch offene Punkte wie Dokumentation etc. anstehen“]                                                                                                                                                                                                                                                                                                                                                                                                         |                                                                                                                                                            |
| „spannender Punkt“, wenn es Widersprüche, ganz unterschiedliche Meinungen gibt, u.a. „Bereitschaft sich um zu entscheiden“ [z.B. aufgrund von mehr Informationen, Pat. sich anders geäußert, schlüssige Schlussfolgerung; Einlassen auf die Meinung des Anderen]<br>--> Übernahme bei untersch. Wahrnehmungen mit ins Abschlussgespräch"                                                                                                                                                                                                                                                                                                                                          |                                                                                                                                                            |
|                                                                                                                                                                                                                                                                                                                                                                                                                                                                                                                                                                                                                                                                                   | eigene Grenzen respektieren/Grenzen der Berufsgruppen respektieren                                                                                         |
| Einfluss auf den Teamprozess - Übergeordnet                                                                                                                                                                                                                                                                                                                                                                                                                                                                                                                                                                                                                                       |                                                                                                                                                            |
| <ul style="list-style-type: none"> <li>• <b>Routine</b></li> <li>• <b>Zeitfaktor</b> (Zeitdruck teilweise spürbar bzw. Relevanz für eigene Themen wird ggf. nicht gesehen, kein Raum für Unsicherheit in der eigenen Einschätzung)</li> <li>• <b>Personen</b> (Charakter/Persönlichkeiten) <ul style="list-style-type: none"> <li>- Häufigkeit der Zusammenarbeit</li> <li>- Kennen der „Besonderheiten“ der Personen (Eigenschaften)</li> <li>- Stellenwert, der einer Person zugeschrieben wird</li> <li>- „neue“ Person</li> </ul> </li> <li>• <b>Hierarchie</b> (in Bezug auf die Stellung der eigenen Person, u.a. auch die Kultur/der Umgang in der Einrichtung)</li> </ul> |                                                                                                                                                            |



## Abschlussgespräch – Struktur/Ablauf

| <b>STRUKTUR/ABLAUF</b> zwischen den Berufsgruppen/mit Patient - <b>REAL</b> - | <b>STRUKTUR/ABLAUF</b> zwischen den Berufsgruppen/mit Patient - <b>IDEAL</b> -        |
|-------------------------------------------------------------------------------|---------------------------------------------------------------------------------------|
| Team 1 [übergeordnet zu folgenden]                                            | 0. Orga[nisation]/Sonstiges [übergeordnet zu folgenden]                               |
| Pat[ient] begrüßt/Erleben [erfragt]                                           | ansprechende räuml[iche] & zeitl[iche] Bedingungen                                    |
| Erkl[ärung] IMST                                                              | Absprache zum Ablauf je Pat[ient] [und] Schwerpunkt                                   |
| Erkl[ärung] d[er] Befunde mit Überleitung/Bezug zueinander                    | 1. Gesprächseröffnung [übergeordnet zu folgenden]                                     |
| Wie sieht d[er] Pat[ient] das]/Fragen                                         | Pat[ient] begrüßen [und] nach Erleben fragen                                          |
| Wunsch d[es] Pat[ienten]                                                      | Einleitende Worte zu M[it]A[rbeitern] [und] Ablauf/Struktur                           |
| Therapie-empfehlung                                                           | Modell/Fragen/Erwartungen d[es] Pat[ienten]                                           |
| Fragen                                                                        | 2. Vermittlung der Befunde [und] Optionen                                             |
| Zusammenfassung                                                               | Erklärung d[er] Befunde (mit Verweis zueinander)                                      |
| Team 2 [übergeordnet zu folgenden]                                            | integrierte Teamempfehlungen unter Berücks[ichtigung] d[er] Wünsche d[es] Pat[ienten] |
| Kommen aus Team                                                               | 3. Abschluss des IMAs [übergeordnet zu folgenden]                                     |
| Pat[ient] kommt rein                                                          | Fragen                                                                                |
| jede Berufsgruppe stellt sich vor, Arzt fängt meist an                        | Zusammenfassung                                                                       |
| Fragen d[es] Pat[ienten]                                                      | Ausblick                                                                              |
| lenkend Therapieempfehlungen                                                  |                                                                                       |
| Missverständnisse klären                                                      |                                                                                       |
| Entscheidungen begründen                                                      |                                                                                       |
| Kompromisse finden g[e]g[ebenen]f[alls]                                       |                                                                                       |
| Verabschiedung                                                                |                                                                                       |
| Hürden [übergeordnet zu folgenden]                                            |                                                                                       |
| manchmal fehlten Professionen aus Zeitgründen                                 |                                                                                       |
| zu wenig Zeit                                                                 |                                                                                       |
| konnte wenig stehen bleiben                                                   |                                                                                       |



## Abschlussgespräch – Interaktion

| <b>INTERAKTION</b> zwischen den Berufsgruppen/mit Patient <b>-REAL-</b>               | <b>INTERAKTION</b> zwischen den Berufsgruppen/mit Patient <b>-IDEAL-</b>    |
|---------------------------------------------------------------------------------------|-----------------------------------------------------------------------------|
| je nach Behandler unterschiedlich                                                     |                                                                             |
| Herausforderung Teamgesprächsführung [übergeordnet zu folgenden]                      | Zeit schaffen [übergeordnet zu folgenden]                                   |
| alle Prof[essionen haben] was gesagt; Arzt beginnt oft                                | Wichtig ist Zeit für Motivation und Veränderung                             |
| jede Prof[ession] sprach für sich                                                     | Zeit für Nachbesprechung/Rückmeldung                                        |
| gemeinsame Gesprächsführung ist manchm[al] holperig                                   |                                                                             |
| [bei uns haben die Professionen] gleich begonnen                                      |                                                                             |
| Zentrumshierarchie /Gewohnheiten/"ungeschriebene Gesetze" [übergeordnet zu folgenden] | Interaktiver Umgang im Team [übergeordnet zu folgenden]                     |
| Arzt eher dominant                                                                    | "eingespieltes" Team                                                        |
| Andere Prof[essionen] eher zurückgenommen                                             | flexible Gesprächsleitung unter den Prof[essionen] [entspricht] Schwerpunkt |
| Psych[ologe]/Physio[therapeut] unsicher                                               | Shared decision making                                                      |
| z.T. nur Arzt anwesend                                                                |                                                                             |
| z.T. nur Arzt vermittelt/gesprochen                                                   |                                                                             |
| Rolle d[es] Pat[ienten] im IMA [übergeordnet zu folgenden]                            | Feedbackkultur [übergeordnet zu folgenden]                                  |
| Pat[ienten] eher offen                                                                | [erfordert] Übung, Sicherheit, Erfahrung                                    |
| Pat[ienten] hatten manchmal festgelegte Vorstellungen                                 |                                                                             |
| Pat[ienten] im Kreis                                                                  |                                                                             |
| P[atienten] fühlen sich ernst genommen (Zeit, verschied[ene] Berufsgruppen)           |                                                                             |
|                                                                                       | Interaktiver Umgang mit Patient [übergeordnet zu folgenden]                 |
|                                                                                       | Am Tisch in einem Kreis                                                     |
|                                                                                       | "auf Augenhöhe" alle [und] Pat[ient]                                        |
|                                                                                       | Gleichberechtigung in der Gesprächsführung                                  |
|                                                                                       | Wertschätzung                                                               |
|                                                                                       | Interaktiver Gesprächsablauf [übergeordnet zu folgenden]                    |
|                                                                                       | Kurze Einleitung, "Abholen" d[es] Pat[ienten]                               |
|                                                                                       | Pat[ient] nach eigenem Erleben/Modell fragen                                |
|                                                                                       | Einleitung zum Ablauf gemeins[ames] Modell                                  |
|                                                                                       | Überleitung, Verbindung zw[ischen] den Profess[ionen]/Disz[iplinen]         |

## Abschlussgespräch – Übermittlung Therapieempfehlung

| <b>ÜBERMITTLUNG<br/>THERAPIEEMPFEHLUNG</b> zwischen den Berufsgruppen/mit Patient <b>-REAL-</b> | <b>ÜBERMITTLUNG<br/>THERAPIEEMPFEHLUNG</b> zwischen den Berufsgruppen/mit Patient <b>-IDEAL-</b> |
|-------------------------------------------------------------------------------------------------|--------------------------------------------------------------------------------------------------|
| Für Entscheidungsfindung mit Pat[ienten] [übergeordnet zu folgenden]                            | Gesprächsführung [übergeordnet zu folgenden]                                                     |
| an die Befunde anknüpfend                                                                       | Interaktiv mit Pat[ient] [und] transparent (I[au]t[es] Denken)                                   |
| Verschiedene Optionen [vorher im Team] vorbereitet                                              | Offenheit für Fachübergreifende Ergänzung[ungen] bzw. Interaktion                                |
| als Team laut gedacht                                                                           | Offenheit/Transparenz im P[atienten]-Gespräch [ergibt] Ergebnisoffenheit                         |
| Interaktiv mit Pat[ienten] mit Wahloptionen                                                     | Moderation d[es] Entscheidungsprozesses                                                          |
| Wer trifft im Gespräch d[ie] Entscheidung?                                                      | Zwischenfragen: Hat der Pat[ient] Fragen? Andere Ansicht?                                        |
| Entscheidung [manchmal] vertagt                                                                 | Vorstrukturierung der Information [übergeordnet zu folgenden]                                    |
| Struktur der Infovermittlung [übergeordnet zu folgenden]                                        | an Befunde anknüpfend (als Begründung)                                                           |
| zu viele "verschiedene" Infos- wie integriert man das?                                          | Schwerpunkte, "nächster Schritt" im Team vorbereiten                                             |
| "viele Bälle in der Luft halten"                                                                | Schriftliche Empfehlungen für den Pat[ient] [erzeugt] Gedächtnisstütze                           |
| Rolle bei der Vermittlung der Therapieempfehlung [übergeordnet zu folgenden]                    |                                                                                                  |
| nicht immer klar- wer ist der Bad Guy                                                           |                                                                                                  |
| "wer hat welche Rolle hier"                                                                     |                                                                                                  |
