# Supplementary material for: Umsetzbarkeit des interdisziplinären multimodalen Assessments – die Teamperspektive
Source: Springer Nature journal article supplement (doi:10.1007/s00482-024-00796-z), 2024-04-09
Supplement: MOESM5 [file 26959478]

## Online-Zusatzmaterial 5 – Gemeinsamkeiten und Unterschiede in der Einschätzung der Kriterien in Vorbereitung auf die Teamsitzung (ausgewählte Aspekte)

| Schweregrad Störungsbild                                                                                        |                                      |                                                             | Bedeutung für die Schmerzproblematik                                                                                   |                                                                                                                                                                          |                                                                                                                                 | IMST-Bedarf vs. Spezifische Behandlung                                                                                                                                                                                   |                                                                          |                                                                                       |
|-----------------------------------------------------------------------------------------------------------------|--------------------------------------|-------------------------------------------------------------|------------------------------------------------------------------------------------------------------------------------|--------------------------------------------------------------------------------------------------------------------------------------------------------------------------|---------------------------------------------------------------------------------------------------------------------------------|--------------------------------------------------------------------------------------------------------------------------------------------------------------------------------------------------------------------------|--------------------------------------------------------------------------|---------------------------------------------------------------------------------------|
| Medizin                                                                                                         | Physiotherapie                       | Psychologie                                                 | Medizin                                                                                                                | Physiotherapie                                                                                                                                                           | Psychologie                                                                                                                     | Medizin                                                                                                                                                                                                                  | Physiotherapie                                                           | Psychologie                                                                           |
| <b>Anamnese/Befunderhebung und dessen Interpretationen (eher bei Bedeutung für die Schmerzproblematik) u.a.</b> |                                      |                                                             |                                                                                                                        |                                                                                                                                                                          |                                                                                                                                 |                                                                                                                                                                                                                          |                                                                          |                                                                                       |
| /Gespräch/<br>/Klin[ischer] Befund/                                                                             | /PT-Befund<br>aktiv/passiv/resistiv/ | /psychosoziale<br>Belastungsfaktoren/                       | /Medikamenteneinnahme/<br>/Korrelation Befund<br>und Schmerz/<br>/Beeinträchtigung/                                    | /Benennen von<br>schmerzauslösenden<br>Aspekten/<br>/Lebensqualität:<br>Hobbies,<br>Freizeitgestaltung/                                                                  | /Psychosoziale<br>Belastung/<br>/sozialer Kontext:<br>[Waage zwischen]<br>Ressourcen/Gesundheitskompetenz<br>[und] Störungsbild |                                                                                                                                                                                                                          |                                                                          |                                                                                       |
| <b>Test- und Assessmentverfahren</b>                                                                            |                                      |                                                             |                                                                                                                        |                                                                                                                                                                          |                                                                                                                                 |                                                                                                                                                                                                                          |                                                                          |                                                                                       |
| /MPSS/<br>/von Korff/                                                                                           | /PSFS/                               | [fließen unspezifisch<br>mit ein, nicht<br>konkret benannt] | /MPSS/<br>/von Korff/                                                                                                  | /PSFS/                                                                                                                                                                   | [fließen unspezifisch<br>mit ein, nicht<br>konkret benannt]                                                                     |                                                                                                                                                                                                                          |                                                                          |                                                                                       |
| /Vorbefunde/<br>/Vordiagnostik/                                                                                 |                                      |                                                             | <b>Patientenbezogene Aspekte</b>                                                                                       |                                                                                                                                                                          |                                                                                                                                 |                                                                                                                                                                                                                          |                                                                          |                                                                                       |
|                                                                                                                 |                                      |                                                             | /Arbeitsunfähigkeit/<br>/häufige Diagnostik<br>bzw.<br>Inanspruchnahme<br>des<br>Gesundheitssystems/<br>/Leidensdruck/ | /Haltung zum<br>Gesundheitsverhalten/<br>Bewegungsverhalten/<br>/Ressourcen<br>funktionell/körperlich<br>/<br>/Stellenwert<br>Schmerz für den<br>Pat./<br>/Leidensdruck/ | /Ausmaß<br>Introspektions- und<br>Reflexionsfähigkeit/<br>/Ressourcen:<br>innere, äußere; „wie<br>ist der Zugang<br>dazu“/      | /Zugänglichkeit für<br>multimodalen<br>Ansatz/<br>/Aufgeschlossenheit<br>für Therapie/<br>/Vorliegen<br>multimodaler<br>Problematik/<br>/Motivation/<br>/Beeinträchtigung im<br>Alltag/<br>/subjektiver<br>Leidensdruck/ | /Stellenwert<br>Schmerz für den<br>Pat./                                 | /Passung Person zu<br>IMST Inhalten/<br>/Ausmaß an<br>ressourcen für den<br>Transfer/ |
|                                                                                                                 |                                      |                                                             | <b>Chronifizierungsprozess</b>                                                                                         |                                                                                                                                                                          |                                                                                                                                 |                                                                                                                                                                                                                          |                                                                          |                                                                                       |
|                                                                                                                 |                                      |                                                             |                                                                                                                        |                                                                                                                                                                          | /gute Prognose<br>[dazu sortiert:]<br>zeitnahe Lösung,<br>Abgrenzbarkeit der<br>psychosoz[ialen]<br>Beeinträchtigung/           | /psychosoziale<br>Faktoren deutlich/                                                                                                                                                                                     | /Dauer<br>Chronifizierungsprozess/<br><br>/Dauer der<br>Symptomatik bzw. | /Gefahr der<br>Chronifizierung/                                                       |

|                                                                                                                                                                                                                                                                                                                                                                                                                                                                                                                                                                                 |                                                                                                                                                                                                                                                                                                                                                                                                                                                                                                                                                                                                                                                                                                                                                                                                                                                                                                                                                      |                                                                               |                                                                                |                                                               |                                                                               |                                                                                |                                               |                                                |                                                    |
|---------------------------------------------------------------------------------------------------------------------------------------------------------------------------------------------------------------------------------------------------------------------------------------------------------------------------------------------------------------------------------------------------------------------------------------------------------------------------------------------------------------------------------------------------------------------------------|------------------------------------------------------------------------------------------------------------------------------------------------------------------------------------------------------------------------------------------------------------------------------------------------------------------------------------------------------------------------------------------------------------------------------------------------------------------------------------------------------------------------------------------------------------------------------------------------------------------------------------------------------------------------------------------------------------------------------------------------------------------------------------------------------------------------------------------------------------------------------------------------------------------------------------------------------|-------------------------------------------------------------------------------|--------------------------------------------------------------------------------|---------------------------------------------------------------|-------------------------------------------------------------------------------|--------------------------------------------------------------------------------|-----------------------------------------------|------------------------------------------------|----------------------------------------------------|
| /schlechte Prognose<br>[dazu sortiert:]<br>wenig/keine<br>Lösungsoption;<br>breites/komplexes<br>Problem- bzw.<br>Belastungsfeld                                                                                                                                                                                                                                                                                                                                                                                                                                                | wiederkehrend[e<br>Schmerzen]/                                                                                                                                                                                                                                                                                                                                                                                                                                                                                                                                                                                                                                                                                                                                                                                                                                                                                                                       |                                                                               |                                                                                |                                                               |                                                                               |                                                                                |                                               |                                                |                                                    |
|                                                                                                                                                                                                                                                                                                                                                                                                                                                                                                                                                                                 | <p style="text-align: center;"><b>Frage nach IMST-Ansatz</b></p> <table border="0" style="width: 100%;"> <tr> <td data-bbox="1435 416 1608 507">/Diskrepanz<br/>Störungsbild und<br/>subj[ektiver]<br/>Eindruck/</td> <td data-bbox="1648 416 1821 517">/spez.<br/>Vorbehandlungen/<br/>/Biopsychosoziales<br/>Modell/</td> <td data-bbox="1861 416 2033 507">/Informierung über<br/>biopsychosoziales<br/>Schmerzmodell<br/>erscheint wichtig/</td> </tr> <tr> <td data-bbox="1435 517 1608 587">/Hinweis auf<br/>affektives<br/>Schmerzerleben/</td> <td data-bbox="1648 517 1821 571">/Inkonsistenzen im<br/>Einzelbefund/</td> <td data-bbox="1861 517 2033 587">/verschiedene<br/>Ebenen relevant<br/>oder „nur“ 1?/</td> </tr> </table> <p data-bbox="1435 596 1608 687">/schlechtes Coping<br/>bzw. umgang mit<br/>Schmerz<br/>dysfunktional/</p> <p data-bbox="1435 697 1608 762">/Schulung/Edukatio<br/>n [im Sinne Bedarf<br/>von].../</p> |                                                                               |                                                                                | /Diskrepanz<br>Störungsbild und<br>subj[ektiver]<br>Eindruck/ | /spez.<br>Vorbehandlungen/<br>/Biopsychosoziales<br>Modell/                   | /Informierung über<br>biopsychosoziales<br>Schmerzmodell<br>erscheint wichtig/ | /Hinweis auf<br>affektives<br>Schmerzerleben/ | /Inkonsistenzen im<br>Einzelbefund/            | /verschiedene<br>Ebenen relevant<br>oder „nur“ 1?/ |
|                                                                                                                                                                                                                                                                                                                                                                                                                                                                                                                                                                                 | /Diskrepanz<br>Störungsbild und<br>subj[ektiver]<br>Eindruck/                                                                                                                                                                                                                                                                                                                                                                                                                                                                                                                                                                                                                                                                                                                                                                                                                                                                                        | /spez.<br>Vorbehandlungen/<br>/Biopsychosoziales<br>Modell/                   | /Informierung über<br>biopsychosoziales<br>Schmerzmodell<br>erscheint wichtig/ |                                                               |                                                                               |                                                                                |                                               |                                                |                                                    |
| /Hinweis auf<br>affektives<br>Schmerzerleben/                                                                                                                                                                                                                                                                                                                                                                                                                                                                                                                                   | /Inkonsistenzen im<br>Einzelbefund/                                                                                                                                                                                                                                                                                                                                                                                                                                                                                                                                                                                                                                                                                                                                                                                                                                                                                                                  | /verschiedene<br>Ebenen relevant<br>oder „nur“ 1?/                            |                                                                                |                                                               |                                                                               |                                                                                |                                               |                                                |                                                    |
| <p style="text-align: center;"><b>Spezifischer Therapiebedarf</b></p> <table border="0" style="width: 100%;"> <tr> <td data-bbox="1435 826 1608 895">/muss ein<br/>„spezielles Problem“<br/>gelöst werden/</td> <td data-bbox="1648 826 1821 895">/spez. Behandlung<br/>bei funktioneller<br/>Problematik/</td> <td data-bbox="1861 826 2033 943">/Ablehnung<br/>psychische Ansätze<br/>[meint ANDERE<br/>Angebote als<br/>Psycho]/</td> </tr> <tr> <td></td> <td></td> <td data-bbox="1861 952 2033 1021">/psych[ische]<br/>Erkrankung im<br/>Vordergrund/</td> </tr> </table> |                                                                                                                                                                                                                                                                                                                                                                                                                                                                                                                                                                                                                                                                                                                                                                                                                                                                                                                                                      |                                                                               | /muss ein<br>„spezielles Problem“<br>gelöst werden/                            | /spez. Behandlung<br>bei funktioneller<br>Problematik/        | /Ablehnung<br>psychische Ansätze<br>[meint ANDERE<br>Angebote als<br>Psycho]/ |                                                                                |                                               | /psych[ische]<br>Erkrankung im<br>Vordergrund/ |                                                    |
| /muss ein<br>„spezielles Problem“<br>gelöst werden/                                                                                                                                                                                                                                                                                                                                                                                                                                                                                                                             | /spez. Behandlung<br>bei funktioneller<br>Problematik/                                                                                                                                                                                                                                                                                                                                                                                                                                                                                                                                                                                                                                                                                                                                                                                                                                                                                               | /Ablehnung<br>psychische Ansätze<br>[meint ANDERE<br>Angebote als<br>Psycho]/ |                                                                                |                                                               |                                                                               |                                                                                |                                               |                                                |                                                    |
|                                                                                                                                                                                                                                                                                                                                                                                                                                                                                                                                                                                 |                                                                                                                                                                                                                                                                                                                                                                                                                                                                                                                                                                                                                                                                                                                                                                                                                                                                                                                                                      | /psych[ische]<br>Erkrankung im<br>Vordergrund/                                |                                                                                |                                                               |                                                                               |                                                                                |                                               |                                                |                                                    |

Legende:

Gemeinsamkeiten Unterschiede

Medizin Physiotherapie Psychologie
