# Supplementary material for: Feasibility of the interdisciplinary multimodal assessment—The team perspective
Source: Schmerz. 2024 Apr 9;39(6):398–416. [Article in German] doi: 10.1007/s00482-024-00796-z (PMC12627191; doi:10.1007/s00482-024-00796-z)
Supplement: Supplementary file 6 — 6. Dokumentationsunterlagen PAIN2020 [file 482_2024_796_MOESM6_ESM.pdf]

Datum: \_\_\_\_\_ Name Patient/in: \_\_\_\_\_

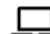

Bitte füllen Sie diesen Fragebogen aus und beantworten jede der Fragen, indem Sie entweder „ja“ oder „nein“ ankreuzen. Die Fragen helfen uns bei der Einschätzung Ihres Krankheitsbildes.

1. Ich befürchte, dass ich eine ernste, bedrohliche Erkrankung habe.  
☐ ja ☐ nein
2. Wegen der Schmerzen habe ich meine körperlichen Aktivitäten sehr stark reduziert.  
☐ ja ☐ nein
3. Ich leide neben den Schmerzen auch noch an anderen körperlichen Symptomen (wie z.B. Magen- und Darmverstimnungen, Schwächegefühle, Schwindel oder Hitzewallungen, Luftnot, Herzrasen, Enge in der Brust, Schwitzen, Kälteschauer, Übelkeit, Kribbeln, Taubheitsgefühle, Schlafstörungen etc.).  
☐ ja ☐ nein
4. Ich war **in den letzten beiden Wochen** meistens traurig oder niedergeschlagen.  
☐ ja ☐ nein
5. Ich habe mich **in den letzten beiden Wochen** meistens angespannt oder besorgt gefühlt.  
☐ ja ☐ nein
6. Ich fühle mich in Bezug auf meine Schmerzen sehr stark verunsichert und weiß überhaupt nicht mehr, was richtig oder falsch ist.  
☐ ja ☐ nein
7. Seit einiger Zeit gibt es bei mir Probleme in der Partnerschaft und/oder in der Familie und/oder dem engeren Freundeskreis.  
☐ ja ☐ nein
8. Falls Sie in einem Arbeitsverhältnis stehen: Es gibt momentan erhebliche Belastungen/Schwierigkeiten im Zusammenhang mit meinem Arbeitsplatz.  
☐ ja ☐ nein ☐ Ich bin derzeit nicht berufstätig
9. Auch bei starken Schmerzen neige ich dazu, alles durchzuziehen und meine Aufgaben abzuschließen.  
☐ ja ☐ nein
10. Ich habe in der letzten Zeit häufiger an schreckliche Ereignisse von **früher** denken müssen oder Träume darüber gehabt (wie z.B. Unfall oder Gewalterfahrung).  
☐ ja ☐ nein

**Patient/in:** \_\_\_\_\_

**Datum:** \_\_\_\_\_

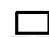[illegible]

Patienten-ID: \_\_\_\_\_

Datum beim Ausfüllen:

|     |  |       |  |      |  |  |  |  |  |
|-----|--|-------|--|------|--|--|--|--|--|
|     |  |       |  |      |  |  |  |  |  |
| Tag |  | Monat |  | Jahr |  |  |  |  |  |

## Schmerz-Bewertungs-Skala (PCS)

Die folgenden dreizehn Sätze beschreiben verschiedene Gedanken und Gefühle, die bei Schmerzen auftreten können. Bitte markieren Sie auf der folgenden Skala eine Zahl bei jeder Frage, wie stark diese Gedanken und Gefühle auf Sie zutreffen, wenn Sie Schmerzen haben.

### Bewertung:

0 = trifft überhaupt nicht zu, 1 = trifft eher nicht zu, 2 = teils-teils, 3 = trifft eher zu, 4 = trifft immer zu

1. Ich mache mir ständig Sorgen, ob die Schmerzen wohl jemals wieder aufhören werden.

|\_\_0\_\_|\_\_1\_\_|\_\_2\_\_|\_\_3\_\_|\_\_4\_\_|H

2. Ich denke, ich kann nicht mehr.

|\_\_0\_\_|\_\_1\_\_|\_\_2\_\_|\_\_3\_\_|\_\_4\_\_|H

3. Der Zustand ist schrecklich und ich denke, dass es nie mehr besser wird.

|\_\_0\_\_|\_\_1\_\_|\_\_2\_\_|\_\_3\_\_|\_\_4\_\_|H

4. Der Zustand ist furchtbar und droht mich zu überwältigen.

|\_\_0\_\_|\_\_1\_\_|\_\_2\_\_|\_\_3\_\_|\_\_4\_\_|H

5. Ich habe das Gefühl, ich halte es nicht mehr aus.

|\_\_0\_\_|\_\_1\_\_|\_\_2\_\_|\_\_3\_\_|\_\_4\_\_|H

6. Ich bekomme Angst, dass die Schmerzen noch stärker werden.

|\_\_0\_\_|\_\_1\_\_|\_\_2\_\_|\_\_3\_\_|\_\_4\_\_|M

7. Ich denke ständig an andere Situationen, in denen ich Schmerzen hatte.

|\_\_0\_\_|\_\_1\_\_|\_\_2\_\_|\_\_3\_\_|\_\_4\_\_|M

8. Ich wünsche mir verzweifelt, dass die Schmerzen weggehen.

|\_\_0\_\_|\_\_1\_\_|\_\_2\_\_|\_\_3\_\_|\_\_4\_\_|R

9. Ich kann nicht aufhören, an die Schmerzen zu denken.

|\_\_0\_\_|\_\_1\_\_|\_\_2\_\_|\_\_3\_\_|\_\_4\_\_|R

10. Ich denke ständig daran, wie sehr es schmerzt.

|\_\_0\_\_|\_\_1\_\_|\_\_2\_\_|\_\_3\_\_|\_\_4\_\_|R

11. Ich denke ständig daran, wie sehr ich mir ein Ende der Schmerzen herbeiwünsche.

|\_\_0\_\_|\_\_1\_\_|\_\_2\_\_|\_\_3\_\_|\_\_4\_\_|R

12. Es gibt nichts, was ich tun kann, um die Schmerzen zu lindern.

|\_\_0\_\_|\_\_1\_\_|\_\_2\_\_|\_\_3\_\_|\_\_4\_\_|R

13. Ich mache mir Sorgen, dass die Schmerzen auf etwas Schlimmes hindeuten.

|\_\_0\_\_|\_\_1\_\_|\_\_2\_\_|\_\_3\_\_|\_\_4\_\_|M

Diese Zeile bitte nicht ausfüllen:

H: \_\_\_\_\_

M: \_\_\_\_\_

R: \_\_\_\_\_

G: \_\_\_\_\_

IMA-Termin Datum: \_\_\_\_\_ Pat-ID: \_\_\_\_\_

## Befunddokumentation

| Kriterium                                     | Befund/<br>Handlungsbedarf | Beurteilung                                                                                                                                                            | Kommentar |
|-----------------------------------------------|----------------------------|------------------------------------------------------------------------------------------------------------------------------------------------------------------------|-----------|
| Morphologische,<br>strukturelle<br>Schädigung |                            | spezif. fachmediz. Therapie<br>indiziert/erforderlich?<br><br>Ja      Fraglich      Nein<br><input type="checkbox"/> <input type="checkbox"/> <input type="checkbox"/> |           |
| Weitere Diagnostik<br>vor IMST notwendig      |                            | Ja      Nein<br><input type="checkbox"/> <input type="checkbox"/>                                                                                                      |           |
| Medikation                                    |                            | Gruppenfähigkeit für IMST<br><br>Ja      Fraglich      Nein<br><input type="checkbox"/> <input type="checkbox"/> <input type="checkbox"/>                              |           |
| Allgemeine<br>Dekonditionierung               |                            | Gruppenfähigkeit für IMST<br><br>Ja      Fraglich      Nein<br><input type="checkbox"/> <input type="checkbox"/> <input type="checkbox"/>                              |           |
| Kardiovaskuläre<br>Belastbarkeit              |                            | Kontraindikationen für IMST<br><br>Ja      Fraglich      Nein<br><input type="checkbox"/> <input type="checkbox"/> <input type="checkbox"/>                            |           |
| Weitere relevante<br>Komorbiditäten           |                            | Kontraindikationen für IMST<br><br>Ja      Fraglich      Nein<br><input type="checkbox"/> <input type="checkbox"/> <input type="checkbox"/>                            |           |

Ziele Patient/in:

---



---



---

Ziele aus ärztlicher Sicht:

---



---



---

Pat-ID: \_\_\_\_\_

## Einschätzung für Teamsitzung

|                 | Schweregrad Störungsbild (somatisch)               | Bedeutung f. Schmerzproblematik                    | Sicherheit der Einschätzung          | IMST-Ansatz erforderlich           | Spezifische Behandlung erforderlich | Gruppenfähigkeit für IMST          | Kontraindikation für IMST          |
|-----------------|----------------------------------------------------|----------------------------------------------------|--------------------------------------|------------------------------------|-------------------------------------|------------------------------------|------------------------------------|
| <b>Ärztlich</b> | _____                                              | _____                                              | _____                                | _____                              | _____                               | _____                              | _____                              |
|                 | 0 = kein<br>1 = leicht<br>2 = mittel<br>3 = schwer | 0 = keine<br>1 = gering<br>2 = moderat<br>3 = hoch | 1 = gering<br>2 = mittel<br>3 = hoch | 0 = nein<br>1 = fraglich<br>2 = ja | 0 = nein<br>1 = fraglich<br>2 = ja  | 0 = nein<br>1 = fraglich<br>2 = ja | 0 = nein<br>1 = fraglich<br>2 = ja |

Bitte bewerten Sie im Anschluss an das IMA folgende Aussagen und notieren Sie gerne Ihre Anmerkungen im Freitext:

| Vom Arzt auszufüllen                                                    | stimme voll und ganz zu  | stimme eher zu           | weder noch               | stimme eher nicht zu     | stimme überhaupt nicht zu |
|-------------------------------------------------------------------------|--------------------------|--------------------------|--------------------------|--------------------------|---------------------------|
| Es lagen relevante Vorbefunde in ausreichendem Maß vor.                 | <input type="checkbox"/>  |
| Es war ausreichend Zeit vorhanden, die vorliegenden Befunde zu sichten. | <input type="checkbox"/>  |
| Die Zeit für die Umsetzung des ärztlichen IMA war ausreichend.          | <input type="checkbox"/>  |
| Freitext:                                                               |                          |                          |                          |                          |                           |

Assessment-Termin Datum: \_\_\_\_\_

Pat-ID: \_\_\_\_\_

### B3. Setting der eingeleiteten bzw. veranlassten Behandlung

- |                                   |                                        |                                    |                                                       |
|-----------------------------------|----------------------------------------|------------------------------------|-------------------------------------------------------|
| <input type="checkbox"/> ambulant | <input type="checkbox"/> teilstationär | <input type="checkbox"/> stationär | <input type="checkbox"/> keine Therapie               |
|                                   |                                        |                                    | <input type="checkbox"/> geplanter einmaliger Kontakt |
|                                   |                                        |                                    | <input type="checkbox"/> ausschließlich Diagnostik    |
|                                   |                                        |                                    | <input type="checkbox"/> Gutachten                    |

### B4. Ergänzende Informationen zum Schmerz

Hauptschmerzlokalisation (mindestens 1 Oberbegriff)

- |                                                        |                                                               |                                                   |                                                    |
|--------------------------------------------------------|---------------------------------------------------------------|---------------------------------------------------|----------------------------------------------------|
| <b>Kopf</b>                                            | <b>Gesicht</b>                                                | <b>Nacken/ Hals</b>                               | <b>Schulter/ Arm</b>                               |
| <input type="checkbox"/> Gesamter Kopf bzw. Kopfhälfte | <input type="checkbox"/> Gesamtes Gesicht bzw. Gesichtshälfte | <input type="checkbox"/> Nacken                   | <input type="checkbox"/> Schulter                  |
| <input type="checkbox"/> occipital                     | <input type="checkbox"/> Oberkiefer                           | <input type="checkbox"/> Hals                     | <input type="checkbox"/> Gesamter Arm              |
| <input type="checkbox"/> parietal                      | <input type="checkbox"/> Unterkiefer                          |                                                   | <input type="checkbox"/> Oberarm                   |
| <input type="checkbox"/> Vertex                        |                                                               |                                                   | <input type="checkbox"/> Unterarm                  |
| <input type="checkbox"/> Stirn                         |                                                               |                                                   | <input type="checkbox"/> Ellenbogen                |
|                                                        |                                                               |                                                   | <input type="checkbox"/> Handgelenk                |
|                                                        |                                                               |                                                   | <input type="checkbox"/> Hand                      |
|                                                        |                                                               |                                                   | <input type="checkbox"/> Finger, Fingergelenke     |
| <b>Thorax</b>                                          | <input type="checkbox"/> Rücken, BWS                          | <input type="checkbox"/> Kreuz, LWS               | <b>Abdomen</b>                                     |
| <input type="checkbox"/> Gesamter Thorax               |                                                               |                                                   | <input type="checkbox"/> Gesamtes Abdomen          |
| <input type="checkbox"/> Thorax lateral                |                                                               |                                                   | <input type="checkbox"/> Oberbauch                 |
| <input type="checkbox"/> Thorax ventral                |                                                               |                                                   | <input type="checkbox"/> Unterbauch                |
|                                                        |                                                               |                                                   | <input type="checkbox"/> Flanke                    |
| <b>Becken</b>                                          | <input type="checkbox"/> Genital-/ Perianalregion             | <b>Bein</b>                                       | <input type="checkbox"/> Wide spread pain          |
| <input type="checkbox"/> Gesamtes Becken               |                                                               | <input type="checkbox"/> Gesamtes Bein            |                                                    |
| <input type="checkbox"/> Leiste                        |                                                               | <input type="checkbox"/> Oberschenkel             |                                                    |
| <input type="checkbox"/> Hüftbereich                   |                                                               | <input type="checkbox"/> Unterschenkel            |                                                    |
| <input type="checkbox"/> Kreuzbein                     |                                                               | <input type="checkbox"/> Knie                     |                                                    |
| <input type="checkbox"/> Steißbein                     |                                                               | <input type="checkbox"/> Sprunggelenk             |                                                    |
|                                                        |                                                               | <input type="checkbox"/> Fuß                      |                                                    |
|                                                        |                                                               | <input type="checkbox"/> Zehen, Zehengelenke      |                                                    |
| <input type="checkbox"/> Polyarthralgien               | <input type="checkbox"/> Hemi-/ Panalgesie                    | <input type="checkbox"/> Gesamter oberer Quadrant | <input type="checkbox"/> Gesamter unterer Quadrant |

☐ Sonstige Schmerzverteilung: \_\_\_\_\_

## Mainz Pain Staging System (MPSS)

Pat-ID: \_\_\_\_\_

| Achse 1: Zeitliche Aspekte                                                                                                           | Wert | Achsensumme              | Achsenstadium                                                         |
|--------------------------------------------------------------------------------------------------------------------------------------|------|--------------------------|-----------------------------------------------------------------------|
| <b>Auftretenshäufigkeit:</b> einmal täglich o. seltener                                                                              | 1    | <input type="checkbox"/> | 3=I<br>4-6=II<br>7-9=III                                              |
| mehrmals täglich                                                                                                                     | 2    |                          |                                                                       |
| dauernd                                                                                                                              | 3    |                          |                                                                       |
| <b>Dauer:</b> bis zu mehreren Stunden                                                                                                | 1    | <input type="checkbox"/> | $\Sigma$                                                              |
| mehrere Tage                                                                                                                         | 2    |                          |                                                                       |
| länger als eine Woche oder dauernd                                                                                                   | 3    |                          |                                                                       |
| <b>Intensitätswechsel:</b> häufig                                                                                                    | 1    | <input type="checkbox"/> |                                                                       |
| gelegentlich                                                                                                                         | 2    |                          |                                                                       |
| nie                                                                                                                                  | 3    |                          |                                                                       |
| <b>Achse 2: Räumliche Aspekte</b>                                                                                                    |      |                          |                                                                       |
| monolokulär                                                                                                                          | 1    | <input type="checkbox"/> |                                                                       |
| bilokulär                                                                                                                            | 2    |                          |                                                                       |
| multilokulär oder Panalgesie                                                                                                         | 3    |                          |                                                                       |
| <b>Achse 3: Medikamenteneinnahmeverhalten</b>                                                                                        |      |                          |                                                                       |
| <b>Medikamenteneinnahme:</b> unregelmäßiger Gebrauch von                                                                             | 1    | <input type="checkbox"/> | 2=I<br>3-4=II<br>5-6=III                                              |
| max. 2 peripheren Analgetika                                                                                                         | 2    |                          |                                                                       |
| max. 3 periphere Analgetika, höchstens 2 regelmäßig<br>regelmäßig mehr als 2 periphere Analgetika oder<br>zentralwirkende Analgetika | 3    |                          |                                                                       |
| <b>Anzahl der Entzugsbehandlungen:</b> keine                                                                                         | 1    | <input type="checkbox"/> | $\Sigma$                                                              |
| eine                                                                                                                                 | 2    |                          |                                                                       |
| mehr als eine                                                                                                                        | 3    |                          |                                                                       |
| <b>Achse 4: Patientenkarriere</b>                                                                                                    |      |                          |                                                                       |
| <b>Wechsel des persönlichen Arztes:</b> kein Wechsel                                                                                 | 1    | <input type="checkbox"/> | 4=I<br>5-8=II<br>9-12=III                                             |
| max. 3 Wechsel                                                                                                                       | 2    |                          |                                                                       |
| mehr als 3 Wechsel                                                                                                                   | 3    |                          |                                                                       |
| <b>Schmerzbedingte Krankenhausaufenthalte:</b> bis 1                                                                                 | 1    | <input type="checkbox"/> | $\Sigma$                                                              |
| 2 bis 3                                                                                                                              | 2    |                          |                                                                       |
| mehr als 3                                                                                                                           | 3    |                          |                                                                       |
| <b>Schmerzbedingte Operationen:</b> bis 1                                                                                            | 1    | <input type="checkbox"/> |                                                                       |
| 2 bis 3                                                                                                                              | 2    |                          |                                                                       |
| mehr als 3                                                                                                                           | 3    |                          |                                                                       |
| <b>Schmerzbedingte Rehabilitationsmaßnahmen:</b> keine                                                                               | 1    | <input type="checkbox"/> | Summe der<br>Achsenstadien<br>I = 4 - 6<br>II = 7 - 8<br>III = 9 - 12 |
| bis 2                                                                                                                                | 2    |                          |                                                                       |
| mehr als 2                                                                                                                           | 3    |                          |                                                                       |

Hauptschmerzdiagnose (ICD-Code, CRPS I und II ergänzen): \_\_\_\_\_

Weitere somatische Diagnosen (keine oder ICD-Code): \_\_\_\_\_

Psychologisch/Psychiatrische Diagnosen (keine, oder ICD-Code): \_\_\_\_\_

### B5. Medikamentöse Behandlung vor Therapiebeginn

Oder Medikamente aus folgenden Gruppen...

☐ NSAR, Coxibe

☐ Andere Nichtopioide

☐ Mischpräparat

☐ keine Medikamente

☐ WHO II

☐ WHO III

☐ Antidepressiva

☐ Triptane

☐ Muskelrelaxantien

☐ Benzodiazepine

☐ Antiemetika

☐ Antikonvulsiva

☐ Laxantien

Sonstige schmerzbezogene Substanzen: \_\_\_\_\_

**IMA-Termin Datum:** \_\_\_\_\_**Pat-ID:** \_\_\_\_\_

Dieser Fragebogen soll dazu verwendet werden, individuelle Aktivitätseinschränkungen im Alltag zu quantifizieren.

Procedere: Am Ende der Anamnese und vor der körperlichen Untersuchung auszufüllen.

Leitfrage an Patienten in der physiotherapeutischen Untersuchung:

„Ich möchte Sie bitten, drei wichtige Aktivitäten zu nennen, welche Sie aufgrund Ihres Schmerzproblems nicht ausführen können oder bei welchen Sie Schwierigkeiten bei der Ausführung haben.“

Anschließend dem Patienten die 10-stufige Skala zeigen, erklären und um Einschätzung bitten.

**Bewertungsschema** für die Ausführung patientenspezifischer Aktivitäten

0      1      2      3      4      5      6      7      8      9      10

Unfähig, die  
Aktivität  
auszuführen

Kann die Aktivität  
auf dem gleichen  
Niveau wie vor der  
Verletzung oder  
dem Problem  
ausführen

**Individuelle Aktivität****Punktzahl 0 - 10**

1.

2.

3.

IMA-Termin Datum: \_\_\_\_\_

Pat-ID: \_\_\_\_\_

| Kriterium                        | Befund                                                                                          | Beurteilung                                                                                                                                                                                           | Kommentar |
|----------------------------------|-------------------------------------------------------------------------------------------------|-------------------------------------------------------------------------------------------------------------------------------------------------------------------------------------------------------|-----------|
| Funktionsstörung                 | Unilokulär: _____<br>Bi-/Multilokulär: _____ Orte                                               | Spezifische physio-<br>therapeutische<br>Behandlung, Intervention<br>erforderlich<br><br>Ja      Fraglich      Nein<br><br><input type="checkbox"/> <input type="checkbox"/> <input type="checkbox"/> |           |
|                                  | Verkettung:      Ja      Nein<br><br><input type="checkbox"/> <input type="checkbox"/>          |                                                                                                                                                                                                       |           |
|                                  | komplexeres<br>Bild:      Ja      Nein<br><br><input type="checkbox"/> <input type="checkbox"/> |                                                                                                                                                                                                       |           |
| Spezifische<br>Einschränkungen   |                                                                                                 | Gruppenfähigkeit für<br>IMST<br><br>Ja      Fraglich      Nein<br><br><input type="checkbox"/> <input type="checkbox"/> <input type="checkbox"/>                                                      |           |
| Gehstrecke                       |                                                                                                 | Gruppenfähigkeit für<br>IMST<br><br>Ja      Fraglich      Nein<br><br><input type="checkbox"/> <input type="checkbox"/> <input type="checkbox"/>                                                      |           |
| Transfer                         |                                                                                                 | Gruppenfähigkeit für<br>IMST<br><br>Ja      Fraglich      Nein<br><br><input type="checkbox"/> <input type="checkbox"/> <input type="checkbox"/>                                                      |           |
| Kardiovaskuläre<br>Belastbarkeit |                                                                                                 | Gruppenfähigkeit für<br>IMST<br><br>Ja      Fraglich      Nein<br><br><input type="checkbox"/> <input type="checkbox"/> <input type="checkbox"/>                                                      |           |

Pat-ID: \_\_\_\_\_

|                                                                                                              |                                                                                        |                                                                                                                                          |  |
|--------------------------------------------------------------------------------------------------------------|----------------------------------------------------------------------------------------|------------------------------------------------------------------------------------------------------------------------------------------|--|
| Allg.<br>Dekonditionierung                                                                                   |                                                                                        | Gruppenfähigkeit für<br>IMST<br>Ja      Fraglich      Nein<br><input type="checkbox"/> <input type="checkbox"/> <input type="checkbox"/> |  |
| Alltagsbelastbarkeit<br>Ergebnis im <b>PSFS</b> :<br>Summe der<br>Punktzahl der<br>jeweiligen<br>Aktivitäten | 1. _____ / ____<br>2. _____ / ____<br>3. _____ / ____<br>Mittelwert NRS aus 1.-3. ____ |                                                                                                                                          |  |
| Sinne (sehen,<br>hören,<br>Gleichgewicht)                                                                    |                                                                                        |                                                                                                                                          |  |
| Vegetativer Status                                                                                           |                                                                                        |                                                                                                                                          |  |
| Hypermobilität                                                                                               |                                                                                        |                                                                                                                                          |  |
| Hypomobilität                                                                                                |                                                                                        |                                                                                                                                          |  |

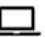

Ziele Patient/in:

---



---



---



---

Ziele aus physiotherapeutischer Sicht:

---



---



---



---

Pat-ID: \_\_\_\_\_

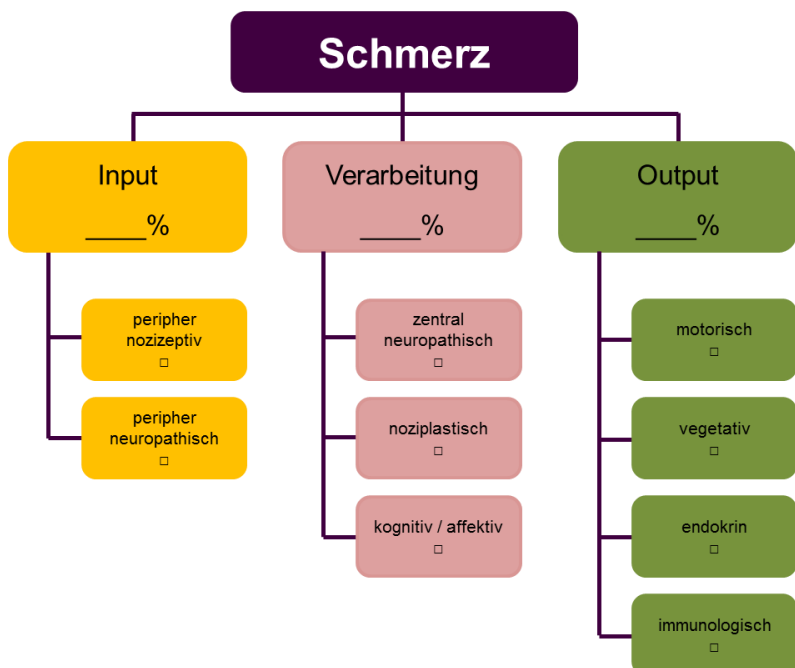
Bitte zeichnen Sie  
die Verteilung von

- Input (I)
- Verarbeitung (V)
- Output (O)

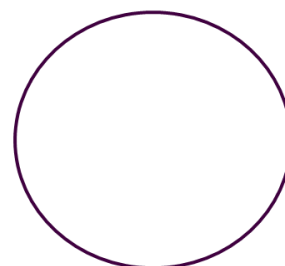

## Einschätzung für Teamsitzung

| Physiotherapeutisch | Schweregrad Störungsbild (funktionell)                      | Bedeutung f. Schmerzproblematik                             | Sicherheit der Einschätzung                   | IMST-Ansatz erforderlich                    | Spezifische Behandlung erforderlich         | Gruppenfähigkeit für IMST                   | Kontraindikation für IMST                   |
|---------------------|-------------------------------------------------------------|-------------------------------------------------------------|-----------------------------------------------|---------------------------------------------|---------------------------------------------|---------------------------------------------|---------------------------------------------|
|                     | _____<br>0 = kein<br>1 = leicht<br>2 = mittel<br>3 = schwer | _____<br>0 = keine<br>1 = gering<br>2 = moderat<br>3 = hoch | _____<br>1 = gering<br>2 = mittel<br>3 = hoch | _____<br>0 = nein<br>1 = fraglich<br>2 = ja |

Bitte bewerten Sie im Anschluss an das IMA folgende Aussagen und notieren Sie gerne Ihre Anmerkungen im Freitext:

| Vom Physiotherapeuten auszufüllen                                         | stimme voll und ganz zu  | stimme eher zu           | weder noch               | stimme eher nicht zu     | stimme überhaupt nicht zu |
|---------------------------------------------------------------------------|--------------------------|--------------------------|--------------------------|--------------------------|---------------------------|
| Es lagen relevante Vorbefunde in ausreichendem Maß vor.                   | <input type="checkbox"/>  |
| Es war ausreichend Zeit vorhanden, die vorliegenden Befunde zu sichten.   | <input type="checkbox"/>  |
| Die Zeit für die Umsetzung des physiotherapeutischen IMA war ausreichend. | <input type="checkbox"/>  |
| Freitext:                                                                 |                          |                          |                          |                          |                           |

IMA-Termin Datum: \_\_\_\_\_

Pat-ID: \_\_\_\_\_

### Schmerz-Beschwerden (PHQ-15)

Sie finden auf diesem Blatt eine Liste von körperlichen Beschwerden, die man manchmal hat. Bitte lesen Sie jede Frage sorgfältig durch und entscheiden Sie, wie sehr Sie **in den letzten Tagen** durch diese Beschwerden gestört oder bedrängt worden sind.  
**Bitte beantworten Sie jede Frage.**

**Wie sehr litten Sie in den letzten Tagen unter ...?**

|                                                                                         | nicht<br>beeinträchtigt | wenig<br>beeinträchtigt | stark<br>beeinträchtigt                 |
|-----------------------------------------------------------------------------------------|-------------------------|-------------------------|-----------------------------------------|
| 1. Bauchschmerzen.....                                                                  | [ 0 ]                   | [ 1 ]                   | [ 2 ]                                   |
| 2. Rückenschmerzen.....                                                                 | [ 0 ]                   | [ 1 ]                   | [ 2 ]                                   |
| 3. Schmerzen in Armen, Beinen, Gelenken<br>(Knie, Hüfte, etc.).....                     | [ 0 ]                   | [ 1 ]                   | [ 2 ]                                   |
| 4. Menstruationsbeschwerden oder andere<br>Probleme Ohnmachts- oder Schwindelgefühlen.. | [ 0 ]                   | [ 1 ]                   | [ 2 ]                                   |
| 5. Schmerzen oder Probleme beim Geschlechts-<br>verkehr.....                            | [ 0 ]                   | [ 1 ]                   | [ 2 ]                                   |
| 6. Kopfschmerzen.....                                                                   | [ 0 ]                   | [ 1 ]                   | [ 2 ]                                   |
| 7. Schmerzen im Brustbereich.....                                                       | [ 0 ]                   | [ 1 ]                   | [ 2 ]                                   |
| 8. Schwindel.....                                                                       | [ 0 ]                   | [ 1 ]                   | [ 2 ]                                   |
| 9. Ohnmachtsanfälle.....                                                                | [ 0 ]                   | [ 1 ]                   | [ 2 ]                                   |
| 10. Herzklopfen oder Herzrasen.....                                                     | [ 0 ]                   | [ 1 ]                   | [ 2 ]                                   |
| 11. Kurzatmigkeit.....                                                                  | [ 0 ]                   | [ 1 ]                   | [ 2 ]                                   |
| 12. Verstopfung, nervöser Darm oder Durchfall.....                                      | [ 0 ]                   | [ 1 ]                   | [ 2 ]                                   |
| 13. Übelkeit, Blähungen oder<br>Verdauungsbeschwerden.....                              | [ 0 ]                   | [ 1 ]                   | [ 2 ]                                   |
|                                                                                         | überhaupt<br>nicht      | an einzelnen<br>Tagen   | an mehr als<br>der Hälfte<br>aller Tage |
| 14. Schwierigkeiten, ein- oder durchzuschlafen,<br>oder vermehrter Schlaf.....          | [ 0 ]                   | [ 1 ]                   | [ 2 ]                                   |
| 15. Müdigkeit, oder das Gefühl keine Energie zu<br>haben.....                           | [ 0 ]                   | [ 1 ]                   | [ 2 ]                                   |

## SKID-Befindlichkeit

**Pat-ID:** \_\_\_\_\_

Wir möchten Ihnen noch einige wichtige Fragen zu Ihrer allgemeinen Befindlichkeit stellen. Bitte beantworten Sie die Fragen möglichst mit ja oder nein. Sollten Sie unsicher sein, können Sie auch mit „unsicher“ antworten.

|     |                                                                                                                                                                                                                      | 0    | 1        | 2  |
|-----|----------------------------------------------------------------------------------------------------------------------------------------------------------------------------------------------------------------------|------|----------|----|
| 1.  | Haben Sie in letzter Zeit fünf oder mehr Gläser Alkohol (Bier, Wein oder Likör) auf einmal getrunken?                                                                                                                | nein | unsicher | ja |
| 2.  | Nehmen Sie Drogen?                                                                                                                                                                                                   | nein | unsicher | ja |
| 3.  | Fühlen Sie sich von einem ärztlich verschriebenen Medikament abhängig oder nehmen Sie mehr davon ein als Ihnen verschrieben wurde?                                                                                   | nein | unsicher | ja |
| 4.  | Leiden Sie unter Angstanfällen, bei denen Sie ganz plötzlich in panischen Schrecken geraten oder starke Angst haben?                                                                                                 | nein | unsicher | ja |
| 5.  | Haben Sie Angst, alleine das Haus zu verlassen, sich in einer Menschenmenge zu befinden, in einer Schlange anzustehen oder mit dem Zug oder Bus zu fahren?                                                           | nein | unsicher | ja |
| 6.  | Haben Sie Angst davor oder ist es Ihnen unangenehm, in Gegenwart anderer Menschen zu sprechen, zu essen oder zu schreiben?                                                                                           | nein | unsicher | ja |
| 7.  | Gibt es andere Dinge, vor denen Sie besonders Angst haben, wie z.B. in einem Flugzeug zu sitzen, Blut zu sehen, sich in geschlossenen Räumen aufzuhalten, vor bestimmten Tieren oder vor Höhe?                       | nein | unsicher | ja |
| 8.  | Leiden Sie unter Gedanken, die unsinnig sind und immer wieder kommen, auch wenn Sie es gar nicht wollen?                                                                                                             | nein | unsicher | ja |
| 9.  | Kommt es vor, dass Sie bestimmte Dinge immer und immer wieder tun müssen, wie z.B. sich immer wieder die Hände zu waschen oder etwas mehrmals zu kontrollieren, um sicherzugehen, dass Sie es richtig gemacht haben? | nein | unsicher | ja |
| 10. | Waren Sie in den letzten sechs Monaten besonders nervös oder ängstlich?                                                                                                                                              | nein | unsicher | ja |
| 11. | Kam es in letzter Zeit vor, dass andere Menschen sagten, Sie seien zu dünn?                                                                                                                                          | nein | unsicher | ja |
| 12. | Haben Sie Essanfälle, bei denen Sie das Gefühl haben, Ihr Essverhalten nicht mehr kontrollieren zu können?                                                                                                           | nein | unsicher | ja |
| 13. | Leiden Sie seit mehreren Monaten unter körperlichen Beschwerden, für die Ihr Arzt keine eindeutige Erklärung finden konnte?                                                                                          | nein | unsicher | ja |
| 14. | Haben Sie jemals ein ungewöhnlich schreckliches oder bedrohliches Ereignis oder eine ungewöhnlich schreckliche oder bedrohliche Situation erlebt, unter deren Nachwirkungen Sie heute noch leiden?                   | nein | unsicher | ja |
| 15. | Fühlen Sie sich mit der Bewältigung eines einschneidenden Ereignisses in Ihrem Leben so stark belastet, dass dadurch Ihr Befinden spürbar beeinträchtigt ist?                                                        | nein | unsicher | ja |

### **DIBpS1-Projektteam:**

Jahed, J., Vogel, B., Baumeister, H., Härter, M., Barth, J. & Bengel, J.

Diagnostik, Indikation und Behandlung von psychischen Störungen in der medizinischen Rehabilitation

IMA-Termin Datum: \_\_\_\_\_

Pat-ID: \_\_\_\_\_

## Dokumentation Testbefunde

|                      |                                                                                                                                                                                                                                                                                                                                                                                                                                                                                                                                                                                                              |
|----------------------|--------------------------------------------------------------------------------------------------------------------------------------------------------------------------------------------------------------------------------------------------------------------------------------------------------------------------------------------------------------------------------------------------------------------------------------------------------------------------------------------------------------------------------------------------------------------------------------------------------------|
| Schmerzintensität:   | momentan _____ durchschnittlich _____ maximal _____                                                                                                                                                                                                                                                                                                                                                                                                                                                                                                                                                          |
| Beeinträchtigung:    | Alltag _____ Freizeit _____ Arbeit _____                                                                                                                                                                                                                                                                                                                                                                                                                                                                                                                                                                     |
| von Korff:           | _____                                                                                                                                                                                                                                                                                                                                                                                                                                                                                                                                                                                                        |
| DASS:                | Depressivität _____ Angst _____ Stressbelastung _____                                                                                                                                                                                                                                                                                                                                                                                                                                                                                                                                                        |
| VR-12:               | Physische Gesundheit, PCS _____ Mentale Gesundheit, MCS _____                                                                                                                                                                                                                                                                                                                                                                                                                                                                                                                                                |
| Weitere:             | FW7: _____ SBL-A: _____                                                                                                                                                                                                                                                                                                                                                                                                                                                                                                                                                                                      |
| PCS:                 | Hilflosigkeit _____ Magnification _____ Rumination _____ $\Sigma$ _____                                                                                                                                                                                                                                                                                                                                                                                                                                                                                                                                      |
| PHQ-15:              | _____                                                                                                                                                                                                                                                                                                                                                                                                                                                                                                                                                                                                        |
| SKID-Befindlichkeit: | <p>Auffällig?</p> <p>Ja                  Nein</p> <p><input type="checkbox"/>                  <input type="checkbox"/></p> <p>Wenn ja, auffällige Bereiche ankreuzen:</p> <p><input type="checkbox"/> 1 <input type="checkbox"/> 2 <input type="checkbox"/> 3 <input type="checkbox"/> 4 <input type="checkbox"/> 5 <input type="checkbox"/> 6 <input type="checkbox"/> 7 <input type="checkbox"/> 8 <input type="checkbox"/> 9 <input type="checkbox"/> 10 <input type="checkbox"/> 11 <input type="checkbox"/> 12 <input type="checkbox"/> 13 <input type="checkbox"/> 14 <input type="checkbox"/> 15</p> |
| MASK-P:              | <p>1 ( ) → _____,                  5 ( ) → _____,</p> <p>2 ( ) → _____,                  6 ( ) → ( ) ( ) ( ) _____,</p> <p>3 ( ) → _____,                  7 ( ) → _____,</p> <p>4 ( ) → _____,                  8 ( ) → _____.</p>                                                                                                                                                                                                                                                                                                                                                                          |

Ziele Patient/in:

---



---

Ziele aus psychologischer Sicht:

---



---

Pat-ID: \_\_\_\_\_

### Einschätzung für Teamsitzung

|                            | Schweregrad<br>Störungsbild<br>(psychosozial)      | Bedeutung f.<br>Schmerz-<br>problematik            | Sicherheit<br>der Ein-<br>schätzung  | IMST-<br>Ansatz<br>erforderlich    | Spezifische<br>Behandlung<br>erforderlich | Gruppen-<br>fähigkeit<br>für IMST  | Kontra-<br>indikation<br>für IMST  |
|----------------------------|----------------------------------------------------|----------------------------------------------------|--------------------------------------|------------------------------------|-------------------------------------------|------------------------------------|------------------------------------|
| <b>psycho-<br/>logisch</b> | _____                                              | _____                                              | _____                                | _____                              | _____                                     | _____                              | _____                              |
|                            | 0 = kein<br>1 = leicht<br>2 = mittel<br>3 = schwer | 0 = keine<br>1 = gering<br>2 = moderat<br>3 = hoch | 1 = gering<br>2 = mittel<br>3 = hoch | 0 = nein<br>1 = fraglich<br>2 = ja | 0 = nein<br>1 = fraglich<br>2 = ja        | 0 = nein<br>1 = fraglich<br>2 = ja | 0 = nein<br>1 = fraglich<br>2 = ja |

**Achsenzusatzkodierung:** Für alle Achsen wird jeweils eines der folgenden Merkmale vergeben:

- 1 Achse wurde nicht untersucht
- 2 keine Auffälligkeiten identifizierbar
- 3 Patient/in sieht Auffälligkeiten nicht
- 4 Patient/in sieht Auffälligkeiten

Für jede Achse können maximal 3 Auffälligkeiten vergeben werden.

| <b>Achse 1: Motorisch-verhaltensmäßige Schmerzverarbeitung</b>                         |   |                                                                |
|----------------------------------------------------------------------------------------|---|----------------------------------------------------------------|
| Achsen-Zusatzkodierung:                                                                |   | <i>kodiere 1, 2, 3 oder 4</i>                                  |
| Bis zu 3 Auffälligkeiten markieren<br>durch ankreuzen<br><br>auf Doku-Beleg übertragen | 1 | Ausgeprägt non-verbales Schmerzverhalten                       |
|                                                                                        | 2 | Ausgeprägt verbales Schmerzverhalten                           |
|                                                                                        | 3 | Diskrepanz zwischen verbalem und non-verbalem Schmerzverhalten |
|                                                                                        | 4 | Defizite im Bitten um soziale Unterstützung                    |
|                                                                                        | 5 | Ausgeprägte Vermeidung körperlicher Aktivitäten                |
|                                                                                        | 6 | Ausgeprägte Vermeidung sozialer Aktivitäten                    |
|                                                                                        | 7 | Ausgeprägtes Durchhalteverhalten                               |
|                                                                                        | 8 | Nichteinhaltung erforderlichen Gesundheitsverhaltens           |
| <b>Achse 2: Emotionale Schmerzverarbeitung</b>                                         |   |                                                                |
| Achsen-Zusatzkodierung:                                                                |   | <i>kodiere 1, 2, 3 oder 4</i>                                  |
| Bis zu 3 Auffälligkeiten markieren<br>durch ankreuzen<br><br>auf Doku-Beleg übertragen | 1 | Traurig-niedergeschlagene Stimmung                             |
|                                                                                        | 2 | Ärgerlich-gereizte Stimmung                                    |
|                                                                                        | 3 | Ängstliche Stimmung                                            |
|                                                                                        | 4 | Leichte innere Erregbarkeit                                    |
|                                                                                        | 5 | Eingeschränktes emotionales Erleben                            |
|                                                                                        | 6 | Mangelnder Emotionsausdruck                                    |
|                                                                                        | 7 | Übertrieben positiver Emotionsausdruck                         |

Pat-ID: \_\_\_\_\_

| <b>Achse 3: Kognitive Schmerzverarbeitung</b>                                       |   |                                                           |
|-------------------------------------------------------------------------------------|---|-----------------------------------------------------------|
| Achsen-Zusatzkodierung:                                                             |   | <i>kodiere 1, 2, 3 oder 4</i>                             |
| Bis zu 3 Auffälligkeiten markieren durch ankreuzen<br><br>auf Doku-Beleg übertragen | 1 | Hilflosigkeit / Katastrophisieren                         |
|                                                                                     | 2 | Resignation / Hoffnungslosigkeit                          |
|                                                                                     | 3 | Suizidgedanken                                            |
|                                                                                     | 4 | Mangelhafte Wahrnehmung körperlicher Vorgänge             |
|                                                                                     | 5 | Ausgeprägte Bagatellisierung körperlicher Vorgänge        |
|                                                                                     | 6 | Ausgeprägte Selbstaufmerksamkeit für körperliche Vorgänge |
|                                                                                     | 7 | Ausgeprägter Durchhalteappell                             |
| <b>Achse 4: Krankheitsbezogene Metakognitionen</b>                                  |   |                                                           |
| Achsen-Zusatzkodierung:                                                             |   | <i>kodiere 1, 2, 3 oder 4</i>                             |
| Bis zu 3 Auffälligkeiten markieren durch ankreuzen<br><br>auf Doku-Beleg übertragen | 1 | Ausgeprägtes somatisches Krankheitsmodell                 |
|                                                                                     | 2 | Ausgeprägte stabile Ursachenattribution                   |
|                                                                                     | 3 | Ausgeprägte externale Kontrollattribution                 |
|                                                                                     | 4 | Ausgeprägte internale Kontrollattribution                 |
|                                                                                     | 5 | Schuldzuschreibungen                                      |
|                                                                                     | 6 | Ausgeprägte Fear-Avoidance-Beliefs                        |
|                                                                                     | 7 | Ausgeprägte Endurance-Beliefs                             |
| <b>Achse 5: Aktuelle Stressoren</b>                                                 |   |                                                           |
| Achsen-Zusatzkodierung:                                                             |   | <i>kodiere 1, 2, 3 oder 4</i>                             |
| Bis zu 3 Auffälligkeiten markieren durch ankreuzen<br><br>auf Doku-Beleg übertragen | 1 | Physikalische Belastungen am Arbeitsplatz                 |
|                                                                                     | 2 | Psychosoziale Belastungen am Arbeitsplatz                 |
|                                                                                     | 3 | Unklarer beruflicher Status                               |
|                                                                                     | 4 | Erhebliche finanzielle Belastungen                        |
|                                                                                     | 5 | Probleme im Familien- und/oder Freundeskreis              |
|                                                                                     | 6 | Ehe- / Partnerschaftsprobleme                             |
|                                                                                     | 7 | Belastungen durch zusätzliche gesundheitliche Probleme    |
|                                                                                     | 8 | Krisenhafte Ereignisse                                    |
|                                                                                     | 9 | Belastungen im Freizeitbereich                            |

Pat-ID: \_\_\_\_\_

| <b>Achse 6: Traumata / Belastungen in der Lebensgeschichte</b>                                                                             |                                                                                                                                                                                                                                             |                                                         |
|--------------------------------------------------------------------------------------------------------------------------------------------|---------------------------------------------------------------------------------------------------------------------------------------------------------------------------------------------------------------------------------------------|---------------------------------------------------------|
| Achsen-Zusatzkodierung:                                                                                                                    |                                                                                                                                                                                                                                             | <i>kodiere 1, 2, 3 oder 4</i>                           |
| Bis zu 3 Auffälligkeiten markieren durch ankreuzen<br>pro Auffälligkeit auch Zeitangabe <u>vorstellen</u><br><br>auf Doku-Beleg übertragen | 1                                                                                                                                                                                                                                           | Verlust naher Angehöriger / Bezugspersonen              |
|                                                                                                                                            | 2                                                                                                                                                                                                                                           | Konflikte innerhalb der Familie / Partnerschaft         |
|                                                                                                                                            | 3                                                                                                                                                                                                                                           | Konflikte am Arbeitsplatz                               |
|                                                                                                                                            | 4                                                                                                                                                                                                                                           | Körperliche und/oder psychische Misshandlungen          |
|                                                                                                                                            | 5                                                                                                                                                                                                                                           | Verlust / Bedrohung der existenziellen Basis            |
|                                                                                                                                            | 6                                                                                                                                                                                                                                           | Akute Lebensbedrohung                                   |
|                                                                                                                                            | 7                                                                                                                                                                                                                                           | Harte Erziehungsbedingungen mit emotionaler Entbehrung  |
|                                                                                                                                            | 8                                                                                                                                                                                                                                           | Schwere körperl./psych. Erkrankung naher Bezugspersonen |
| 9                                                                                                                                          | Eigene schwere körperliche / psychische Erkrankung                                                                                                                                                                                          |                                                         |
| ↑<br>Zeitzusatz-Kodierung                                                                                                                  | 1 Kindheit (bis 6 Jahre)<br>2 Jugendzeit (bis 18 Jahre)<br>3 Erwachsenenalter (ab 18 Jahre)<br>4 Kindheit und Jugendzeit<br>5 Jugendzeit und Erwachsenenalter<br>6 Kindheit und Erwachsenenalter<br>7 Kindheit, Jugend und Erwachsenenalter |                                                         |

  

| <b>Achse 7: Habituelle Personen-Merkmale</b>                                        |   |                                                      |
|-------------------------------------------------------------------------------------|---|------------------------------------------------------|
| Achsen-Zusatzkodierung:                                                             |   | <i>kodiere 1, 2, 3 oder 4</i>                        |
| Bis zu 3 Auffälligkeiten markieren durch ankreuzen<br><br>auf Doku-Beleg übertragen | 1 | Selbstüberforderung bei exzessivem Leistungsanspruch |
|                                                                                     | 2 | Mangelnde soziale Kompetenz                          |
|                                                                                     | 3 | Selbstwertdefizite                                   |
|                                                                                     | 4 | Starre Norm- und Wertvorstellungen                   |
|                                                                                     | 5 | Mangelnde Selbstreflexion / Introspektionsfähigkeit  |
|                                                                                     | 6 | Mangelnde Wahrnehmung eigener Stressreaktionen       |
|                                                                                     | 7 | Psychophysiologische Reaktionsstereotypie            |
|                                                                                     | 8 | Abhängigkeitsverhalten                               |

  

| <b>Achse 8: Maladaptive Stressverarbeitung</b>                                      |   |                                                             |
|-------------------------------------------------------------------------------------|---|-------------------------------------------------------------|
| Achsen-Zusatzkodierung:                                                             |   | <i>kodiere 1, 2, 3 oder 4</i>                               |
| Bis zu 3 Auffälligkeiten markieren durch ankreuzen<br><br>auf Doku-Beleg übertragen | 1 | Katastrophisierend-/vermeidende Stressverarbeitung          |
|                                                                                     | 2 | Resignativ-/rückzugsbetonte Stressverarbeitung              |
|                                                                                     | 3 | Ärger-betonte Stressverarbeitung und Kontrollillusion       |
|                                                                                     | 4 | Mangelnde Wahrnehmung/Bagatellisierung von Stressreaktionen |
|                                                                                     | 5 | Übermäßige körperliche Ablenkung bei Stress                 |
|                                                                                     | 6 | Mangel an entspannungsfördernder Stressbewältigung          |
|                                                                                     | 7 | Mangel an emotionsregulierender Stressbewältigung           |
|                                                                                     | 8 | Mangel an sozial kompetenter Stressverarbeitung             |

Pat-ID: \_\_\_\_\_

**Bitte bewerten Sie im Anschluss an das IMA folgende Aussagen und notieren Sie gerne Ihre Anmerkungen im Freitext:**

| Vom Psychologen auszufüllen                                                        | stimme voll und ganz zu  | stimme eher zu           | weder noch               | stimme eher nicht zu     | stimme überhaupt nicht zu |
|------------------------------------------------------------------------------------|--------------------------|--------------------------|--------------------------|--------------------------|---------------------------|
| Es lagen relevante Vorbefunde in ausreichendem Maß vor.                            | <input type="checkbox"/>  |
| Es war ausreichend Zeit vorhanden, die vorliegenden Befunde zu sichten.            | <input type="checkbox"/>  |
| Die Zeit für die Umsetzung des psychologischen IMA war ausreichend.                | <input type="checkbox"/>  |
| Freitext: <div style="border: 1px solid black; height: 150px; width: 100%;"></div> |                          |                          |                          |                          |                           |

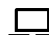

IMA-Termin Datum: \_\_\_\_\_ Pat-ID: \_\_\_\_\_

### Übertrag Einzelbefunde (nur für Teamübersicht)

|                  | Schwere-<br>grad<br>Störungsbild                   | Bedeutung f.<br>Schmerz-<br>problematik            | Sicherheit<br>der Ein-<br>schätzung  | IMST-<br>Ansatz<br>erforderlich    | Spezifische<br>Behandlung<br>in<br>Fachbereich<br>erforderlich | Gruppen-<br>fähigkeit<br>für IMST  | Kontra-<br>indikation<br>für IMST   |
|------------------|----------------------------------------------------|----------------------------------------------------|--------------------------------------|------------------------------------|----------------------------------------------------------------|------------------------------------|-------------------------------------|
| <b>ärztlich</b>  | _____                                              | _____                                              | _____                                | _____                              | _____                                                          | _____                              | _____                               |
| <b>physioth.</b> | _____                                              | _____                                              | _____                                | _____                              | _____                                                          | _____                              | _____                               |
| <b>psychol.</b>  | _____                                              | _____                                              | _____                                | _____                              | _____                                                          | _____                              | _____                               |
|                  | 0 = kein<br>1 = leicht<br>2 = mittel<br>3 = schwer | 0 = keine<br>1 = gering<br>2 = moderat<br>3 = hoch | 1 = gering<br>2 = mittel<br>3 = hoch | 0 = nein<br>1 = fraglich<br>2 = ja | 0 = nein<br>1 = fraglich<br>2 = ja                             | 0 = nein<br>1 = fraglich<br>2 = ja | 0 = nein<br>1 = fraglich.<br>2 = ja |

### Einschätzung Team über Ursachenmodell Patient/in:

| kein Modell              | rein somatisch           | in Ansätzen<br>bio-psycho-sozial | bio-psycho-sozial        |
|--------------------------|--------------------------|----------------------------------|--------------------------|
| <input type="checkbox"/> | <input type="checkbox"/> | <input type="checkbox"/>         | <input type="checkbox"/> |

Ziele Team (für den Pat.):

---



---



---

### Therapieempfehlung TEAM (Bitte ankreuzen)

| Grundsätzliche Einschätzung                                                |                             |                               |
|----------------------------------------------------------------------------|-----------------------------|-------------------------------|
| Weitergehende Diagnostik <u>vor</u> Therapieentscheidung notwendig         | <input type="checkbox"/> Ja | <input type="checkbox"/> Nein |
| IMST-Ansatz erforderlich?                                                  | <input type="checkbox"/> Ja | <input type="checkbox"/> Nein |
| Kontraindikation für IMST gegeben (somatisch/psychologisch)?               | <input type="checkbox"/> Ja | <input type="checkbox"/> Nein |
| Gruppenfähigkeit gegeben?                                                  | <input type="checkbox"/> Ja | <input type="checkbox"/> Nein |
| Vorrangig spez. Therapiebedarf (Med, Psy, PT), nicht in IMST integrierbar? | <input type="checkbox"/> Ja | <input type="checkbox"/> Nein |

Pat-ID: \_\_\_\_\_

| Konkrete Empfehlung (Mehrfachangaben möglich)                                                   | Empfehlung TEAM | Empfehlung nach Abschlussgespräch |
|-------------------------------------------------------------------------------------------------|-----------------|-----------------------------------|
| Akut-stationäre Einrichtung (Prüfung einer OP-Indikation)                                       |                 |                                   |
| Weiterführung der bestehenden hausärztlichen Behandlung ist ausreichend                         |                 |                                   |
| Weiterführung der bestehenden fachärztlichen Behandlung ist ausreichend                         |                 |                                   |
| Neue ambulante fachärztliche Behandlung mit Angabe der Fachrichtung                             |                 |                                   |
| Anpassung der medikamentösen Therapie                                                           |                 |                                   |
| Weiterführung oder Ausbau der alltäglichen körperlichen Aktivität                               |                 |                                   |
| Funktionstraining/Rehasport                                                                     |                 |                                   |
| Physiotherapie, Ergotherapie oder Logopädie mit Angabe PT/ET/LP                                 |                 |                                   |
| Ambulante Psychotherapie                                                                        |                 |                                   |
| Psychosomatische Einrichtung                                                                    |                 |                                   |
| Ambulante oder stationäre Reha-Behandlung                                                       |                 |                                   |
| Edukative IMST (E-IMST)                                                                         |                 |                                   |
| Begleitende IMST (B-IMST)<br>Keine Kombination mit anderen neuen Verfahren der Regelversorgung! |                 |                                   |
| (Teil-)stationäre IMST (im Rahmen der Regelversorgung)                                          |                 |                                   |
| Sonstiges                                                                                       |                 |                                   |

**Bitte denken Sie daran, die Diagnosen inkl. möglicher weiterer somatischer sowie psychologischer / psychiatrischer Diagnosen im Team zu besprechen und in C5 einzutragen!**

### Abschlussgespräch mit Patient/in

Ziele Patient/in:

---



---

**Pat-ID:** \_\_\_\_\_

### Begründung im Fall von Abweichungen von der Empfehlung

(bitte auch in Tabelle Therapieempfehlung TEAM notieren):

- ☐ Pat. lehnt Therapieempfehlung ab (z.B. kein Interesse, lehnt Therapiekonzept ab).
- ☐ Pat. lehnt aus organisatorischen Gründen die Therapieempfehlung ab.
- ☐ Sonstiges: \_\_\_\_\_

### Dokumentation Befundbericht

|                          |        |
|--------------------------|--------|
| Befundbericht verschickt | Datum: |
|--------------------------|--------|

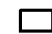

**Bitte bewerten Sie im Team im Anschluss an das Abschlussgespräch folgende Aussagen. Sollte eine interdisziplinäre Einigung nicht möglich sein, kreuzen Sie nichts an.**

| Vom Team auszufüllen                                                                     | stimme voll<br>und ganz zu | stimme<br>eher zu        | weder<br>noch            | stimme<br>eher<br>nicht zu | stimme<br>überhaupt<br>nicht zu |
|------------------------------------------------------------------------------------------|----------------------------|--------------------------|--------------------------|----------------------------|---------------------------------|
| Im Team bestand Konsens in Bezug auf die Therapieempfehlungen.                           | <input type="checkbox"/>   | <input type="checkbox"/> | <input type="checkbox"/> | <input type="checkbox"/>   | <input type="checkbox"/>        |
| Es war leicht mit Patienten ein gemeinsames Ziel zu definieren.                          | <input type="checkbox"/>   | <input type="checkbox"/> | <input type="checkbox"/> | <input type="checkbox"/>   | <input type="checkbox"/>        |
| Die Zeit für die Umsetzung der Teambesprechung / des Abschlussgesprächs war ausreichend. | <input type="checkbox"/>   | <input type="checkbox"/> | <input type="checkbox"/> | <input type="checkbox"/>   | <input type="checkbox"/>        |
| Freitext:                                                                                |                            |                          |                          |                            |                                 |

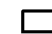

## IMA Algorithmus

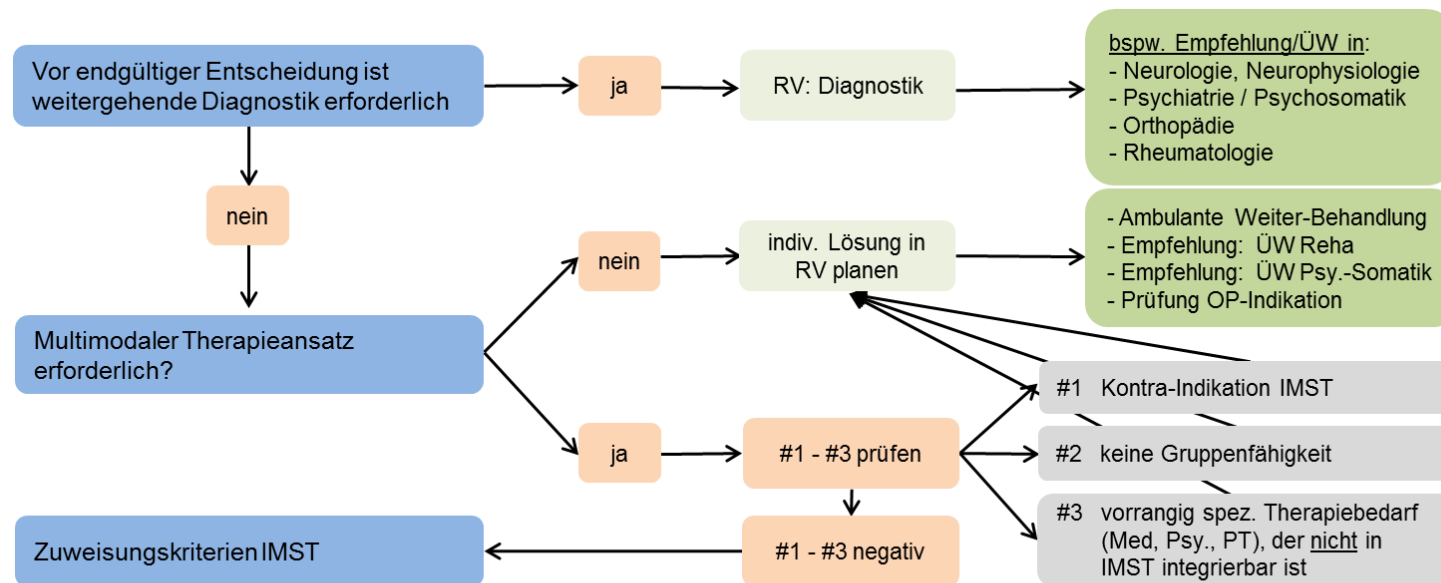

RV: Regelversorgung  
 ÜW: Überweisung  
 ET: Einzeltherapie  
 PT: Physiotherapie  
 Psy: Psychotherapie  
 Med: Medizin. Behandlung  
 \* Ergänzende, parallele Einzeltherapie in der  
 RV bei positiver klinischer Beurteilung

|                                                                                                                | IMST im Rahmen der Studie |                | RV         |
|----------------------------------------------------------------------------------------------------------------|---------------------------|----------------|------------|
|                                                                                                                | E-IMST                    | B-IMST         | T/S-IMST   |
| MPSS-Chronifizierung (I-III)                                                                                   | I / II                    | I / II         | II / III   |
| v.Korff-Graduierung (1-4)                                                                                      | bis 2                     | bis 4          | 3 und 4    |
| Komplexität der Störung<br>Einfluss-/Risikofaktoren auf allen Ebenen<br>des bio-psycho-sozialen Schmerzmodells | gering                    | hoch           | hoch       |
| Regelmäßige Einzeltherapie PT                                                                                  | möglich*                  | nein, ÜW in RV | integriert |
| Regelmäßige Einzeltherapie PSY                                                                                 | möglich*                  | nein, ÜW in RV | integriert |
| Regelmäßige Einzeltherapie Med                                                                                 | möglich*                  | nein, ÜW in RV | integriert |
